# Supplementary material for: Practical access to highly enantioenriched quaternary carbon Michael adducts using simple organocatalysts
Source: Royal Society of Chemistry journal article supplement (doi:10.1039/c0ob00822b), 2010-10-15
Supplement: c0ob00822b.pdf [file c0ob00822b.pdf]

## Supporting Information

# Practical access to highly enantioenriched quaternary carbon Michael adducts using simple organocatalysts

Thomas C. Nugent,\* Mohammad Shoaib, and Amna Shoaib

### General information:

All reactions were performed in 2.0 mL screw cap vials. Liquid reagents were transferred with glass syringes. Routine monitoring of reactions were performed by thin-layer chromatography (TLC) using precoated plates of silica gel 60 F<sub>254</sub> and visualized under ultraviolet irradiation (254 nm). Column chromatography separations were performed with silica gel 60 (0.040-0.063 mm). Petroleum ether with a boiling point range of 60-80 °C was used. Organic extracts were dried over anhydrous sodium sulfate. Evaporation of solvent was performed at reduced pressure.

**Materials:** Commercial reagents were used as received from Sigma-Aldrich.

Nitroalkenes: *trans*-β-Nitrostyrene (Ald. Cat. No. N26806), *trans*-4-methoxy-β-nitrostyrene (Ald. Cat. No. 399299), *trans*-4-methyl-β-nitrostyrene (Ald. Cat. No. 424757), *trans*-4-chloro-β-nitrostyrene (Ald. Cat. No. 642177), *trans*-4-fluoro-β-nitrostyrene (Ald. Cat. No. 09506), *trans*-2-methoxy-β-nitrostyrene (Ald. Cat. No. 639710), *trans*-2-bromo-β-nitrostyrene (Ald. Cat. No. 642215), *trans*-2-(2-nitrovinyl)furan (Ald. Cat. No. 478717), 2-isobutyl-1-nitroethene<sup>1</sup> and 2-styryl-1-nitroethene [(1E,2E)-4-nitrobuta-1,3-dienyl benzene]<sup>2</sup> were synthesized according to previously published procedures.

Aldehydes: Isobutyraldehyde (2-methylpropanal, Ald. Cat. No. 240788, 99% pure), 2-methylbutanal (Ald. Cat. No. M33476, 95% pure), cyclopentanecarbaldehyde (Ald. Cat. No. 526037, 97% pure), cyclohexanecarbaldehyde (Ald. Cat. No. 108464, 97% pure), 2-methylundecanal (Ald. Cat. No. M86758, 95% pure), 2,6-dimethylhept-5-enal (Ald. Cat. No. W238902).

Catalyst components: DMAP (Ald. Cat. No. 29224), sulfamide (Ald. Cat. No. 211370), O<sup>t</sup>Bu-L-threonine (Ald. Cat. No. 20644) were purchased from Sigma-Aldrich. Schreiner's thiourea can be purchased from many smaller sized chemical companies or synthesized.<sup>3</sup>

**Instrumentation:** NMR spectra were recorded on a JEOL ECX 400 spectrometer, operating at 400 MHz (<sup>1</sup>H) and 100 MHz (<sup>13</sup>C) respectively. Chemical shifts (δ) were reported in parts per million (ppm) downfield from tetramethylsilane (TMS = 0) or relative to CHCl<sub>3</sub> (7.26 ppm) for <sup>1</sup>H NMR. Multiplicities are abbreviated as: (s = singlet, d = doublet, t = triplet, q = quartet, br = broad, m = multiplet). Coupling constants are expressed in Hz. FT-IR spectra were obtained on Nicolet Avatar 370 thermonicolet spectrometer. MS data was measured on a Bruker Daltonics HCT Ultra. HRMS were recorded on a Bruker micrOTOF instrument with an ionization potential of 70 eV with ESI positive mode. All chiral HPLC analysis were performed on a CHIRALCEL OD-H column with *n*-heptane and *i*-propanol as eluents.

<sup>1</sup> O. Bassas, J. Huuskonen, K. Rissanen, A. M. P. Koskinen, *Eur. J. Chem.* **2009**, 1340-1351.

<sup>2</sup> C. Dockendorff, S. Sahli, M. Olsen, L. Milhau, M. Lautens, *J. Am. Chem. Soc.* **2005**, 127, 15028-15029.

<sup>3</sup> M. Kotke, P. R. Schreiner, *Tetrahedron* **2006**, 62, 434-439.

**Preliminary screening:** Different amino acids, bases and hydrogen bond donors were screened to better understand the important reaction partners.

Amino Acids: L-proline, L-isoleucine L-tryptophan, L-phenylglycine, L-leucine, L-phenylalanine, L-valine, O'Bu-L-threonine.

Bases: DMAP, imidazole, DABCO, LiOH, tetrabutylammoniumhydroxide (30 hydrate), DBU,  $iPr_2NEt$ , N-methylmorpholine,  $Et_3N$ .

Hydrogen bond donors: In addition to the hydrogen bond donors shown in the Fig. 1 of the manuscript, the following hydrogen bond donors were also screened but found to be less effective in terms of reaction rate and enantioinduction.

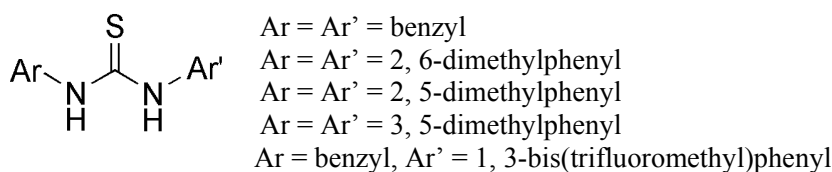

#### **Absolute and relative configuration:**

The absolute configuration of compounds **8-22** was determined by chiral HPLC data comparison with the reported literature values.<sup>4,5,6,7,8,9</sup> For compounds **8-17** see references 4-6. For compounds **18-22** see references 7-9. The absolute configuration of compounds **23** and **24** are assumed based on the general trend observed for compound **22**, and the related compounds **20** and **21**. The relative stereochemistry (*anti* and *syn* assignment) followed a similar analysis using the above noted references, but additionally included  $^1H$  NMR comparisons.

#### **Racemate formation:**

To a screw cap vial was added sulfamide (**3**) (2.4 mg, 0.025 mmol, 5.0 mol%), glycine (1.9 mg, 0.025 mmol, 5.0 mol%) and DMAP (3.1 mg, 0.025 mmol, 5.0 mol%). To this mixture was added toluene (1.0 M, 0.50 mL), and the aldehyde (2.00 equiv, 1.00 mmol). This mixture was then stirred for 2 minutes at room temperature. The nitroalkene (1.00 equiv, 0.50 mmol) was then added and the reaction stirred at room temperature. TLC was used to monitor the reaction. After completion the reaction was quenched by adding water (15 mL) and the resulting mixture was extracted with EtOAc (20 mL x 3). The combined organic extracts were dried over sodium sulfate, and evaporated under reduced pressure. The crude racemate was purified by column chromatography using EtOAc/pet ether.

#### **General procedure for the enantioselective Michael addition of $\alpha,\alpha'$ - and $\alpha,\alpha'$ -disubstituted aldehydes to nitroalkenes:**

<sup>4</sup> X. Zhang, S. Liu, X. Li, M. Yan, A. S. C. Chan, *Chem. Commun.* **2009**, 833–835.

<sup>5</sup> C. Chang, S. H. Li, R. J. Reddy, K. Chen, *Adv. Synth. Catal.* **2009**, 351, 1273 – 1278.

<sup>6</sup> S. H. McCooney, S. J. Connon, *Org. Lett.*, **2007**, 9, 599-602.

<sup>7</sup> J. Wang, H. Li, B. Lou, L. Zu, H. Guo, W. Wang, *Chem. Eur. J.* **2006**, 12, 4321 – 4332.

<sup>8</sup> N. Mase, R. Thayumanavan, F. Tanaka, C. F. Barbas, *Org. Lett.* **2004**, 6, 2527-2530.

<sup>9</sup> M. P. Lalonde, Y. Chen, E. N. Jacobsen, *Angew. Chem. Int. Ed.* **2006**, 45, 6366 –6370.

Three general reaction conditions were found to be optimal depending on the aldehyde examined. The limiting reagent was the nitroalkene, which was always used at the 0.50 mmol scale:

**Method A (Schreiner's thiourea 4):**

To a screw cap vial was added O<sup>t</sup>Bu-L-threonine (1.8 mg, 0.01 mmol, 2.0 mol%), Schreiner's thiourea **4** (5.0 mg, 0.01 mmol, 2.0 mol%), and DMAP (4.9 mg, 0.04 mmol, 8.0 mol%). To this mixture was added cyclohexane (1.0 M, 0.50 mL), and the aldehyde (1.2 equiv (0.6 mmol) or 2.00 equiv (1.0 mmol)). This mixture was then stirred for 2 minutes at room temperature. The nitroalkene (1.00 equiv, 0.50 mmol) was then added and the reaction mixture was stirred for the indicated time at room temperature. TLC was used to monitor the reaction. After completion, the reaction was quenched by adding water (15 mL) and the resulting mixture was extracted with EtOAc (20 mL x 3). The combined organic extracts were dried over sodium sulfate, filtered, rotatory evaporated, and finally dried under high vacuum. When the crude product was not chemical pure it was purified by column chromatography using EtOAc/pet ether.

**Method B (Sulfamide 3, Table 2 reactions):**

To a screw cap vial was added O<sup>t</sup>Bu-L-threonine (4.4 mg, 0.025 mmol, 5.0 mol%), sulfamide (**3**) (2.40 mg, 0.025 mmol, 5.0 mol%), and DMAP (3.05 mg, 0.025 mmol, 5.0 mol%). To this mixture was added toluene (1.0 M, 0.50 mL), and the aldehyde (1.2 equiv, 0.6 mmol). This mixture was then stirred for 2 minutes at room temperature. The nitroalkene (1.00 equiv, 0.50 mmol) was then added and the reaction became homogenous within 10 minutes of stirring. The reaction time is indicated in the individual descriptions on the pages that follow. TLC was used to monitor the reaction. Work-up as in Method A. Note: Schreiner's thiourea (**4**) is organic soluble, while sulfamide (**3**) is water soluble.

**Method C (Sulfamide 3, Table 3 reactions):**

Same as method B, except 15 mol% of the DMAP (9.2 mg) and 2.00 equivalents (1.0 mmol) of the aldehyde were used.

On the following pages all synthesized products, **8-24**, are detailed. Note, compounds **23** and **24** are described here for the first time in the literature.

### (S)-2,2-dimethyl-4-nitro-3-phenylbutanal (**8**):

The title compound was prepared from *trans*- $\beta$ -nitrostyrene and isobutyraldehyde using methods A and B.

Compound obtained using method A (2 equiv. of isobutyraldehyde): Reaction time: 5 h; flash column chromatography: (EtOAc/Pet ether = 7:93); yield = 82%; ee = 93% as determined by HPLC (CHIRALCEL OD-H, *i*-PrOH/n-heptane 20/80, flow rate = 1.0 mL/min,  $\lambda$  = 220 nm);  $t_{\text{minor}}$  = 13.8 min,  $t_{\text{major}}$  = 18.9 min.

Compound obtained using method B: Reaction time: 7 h; No column chromatography was required,  $^1\text{H}$  NMR (see spectrum on p. S-12) and HPLC (chromatogram on p. S-11) of the crude product showed it to be of very high chemical purity; yield = 97%; ee = 98% as determined by HPLC (conditions and retention times as above).  $^1\text{H}$  NMR (400 MHz,  $\text{CDCl}_3$ ) (ppm): 1.00 (s, 3H), 1.13 (s, 3H), 3.78 (dd, 1H,  $J$  = 4.1, 11.4 Hz), 4.69 (dd, 1H,  $J$  = 4.1, 12.8 Hz), 4.86 (dd, 1H,  $J$  = 11.4, 12.8 Hz), 7.19-7.20 (m, 2H), 7.26-7.35 (m, 3H), 9.52 (s, 1H).

### Racemic 2,2-dimethyl-4-nitro-3-phenylbutanal

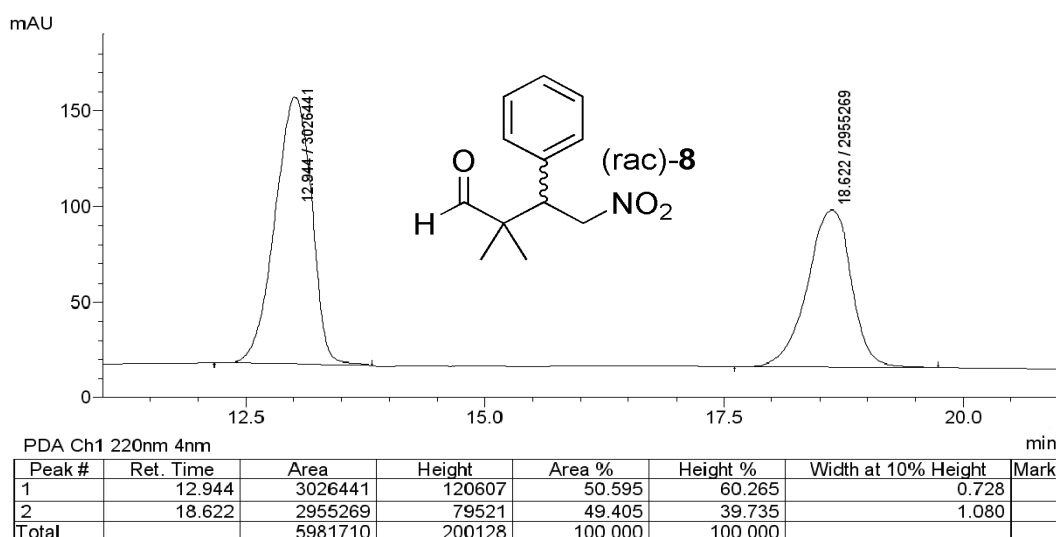

### Enantioenriched 2,2-dimethyl-4-nitro-3-phenylbutanal

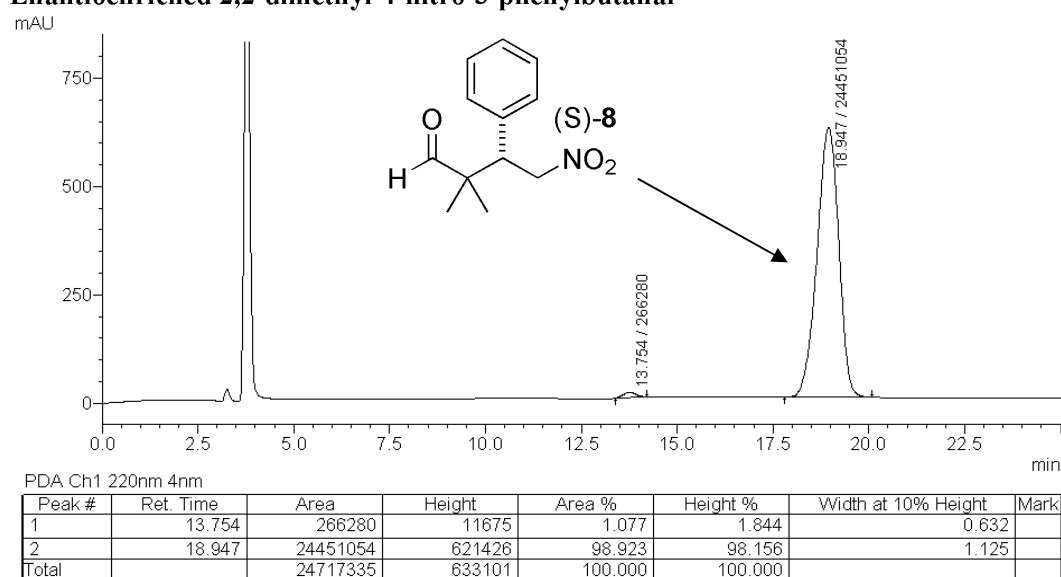

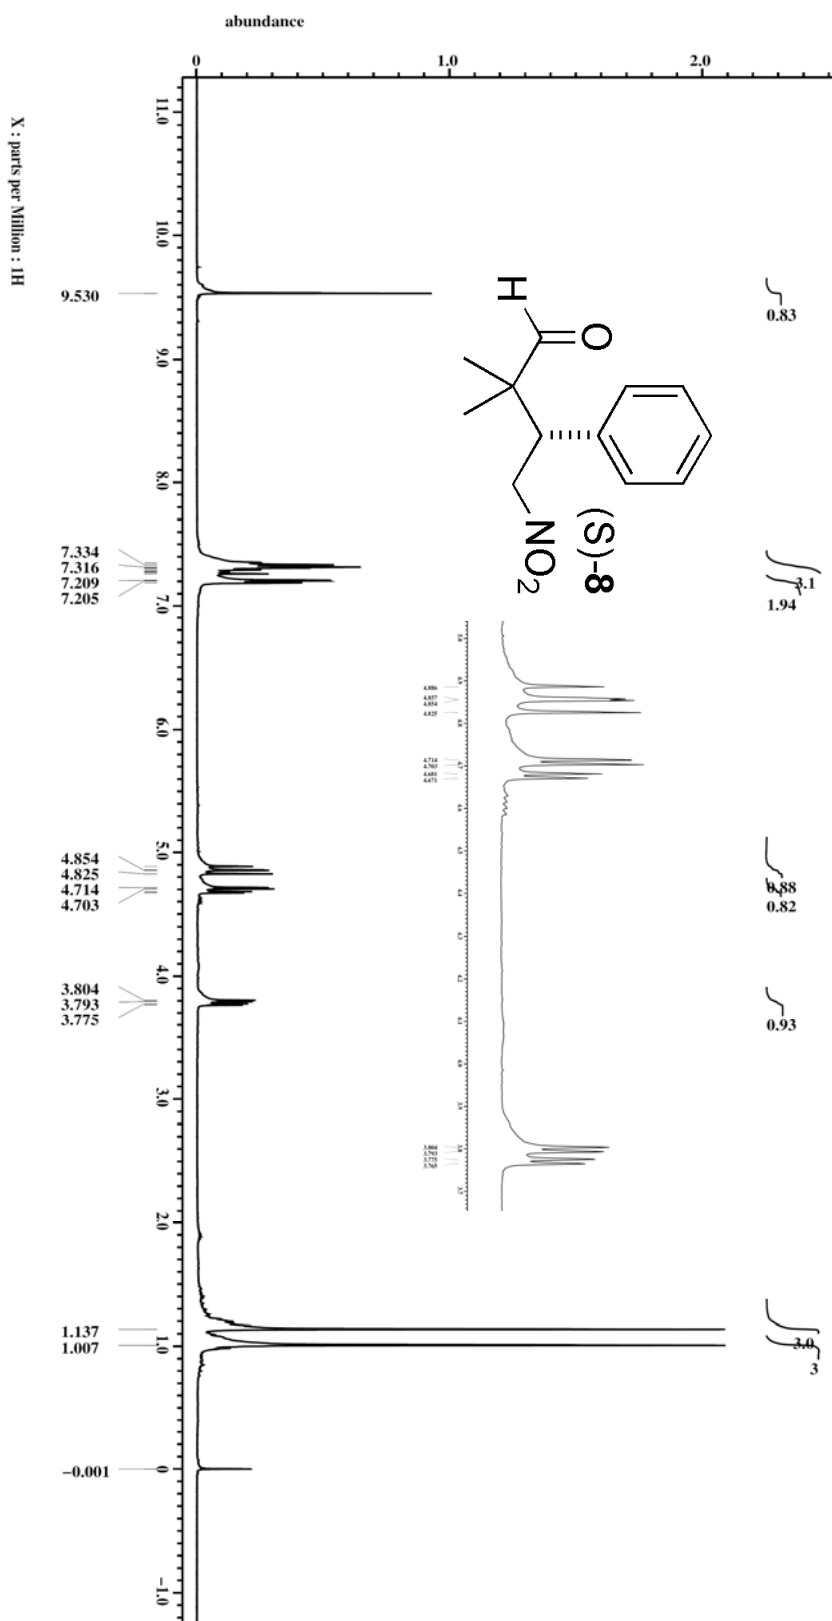

**(S)-3-(4-chlorophenyl)-2,2-dimethyl-4-nitrobutanal (9):**

The title compound was prepared from *trans*-4-chloro- $\beta$ -nitrostyrene and isobutyraldehyde using method B. Reaction time: 24 h; No column chromatography was required,  $^1\text{H}$  NMR (see spectrum on p. S-14) and HPLC (chromatogram on p. S-13) of the crude product showed it to be of very high chemical purity; yield = 98%; ee = 96% as determined by HPLC (CHIRALCEL OD-H, *i*-PrOH/*n*-heptane 20/80, flow rate = 0.8 mL/min,  $\lambda$  = 220 nm);  $t_{\text{minor}}$  = 14.1 min,  $t_{\text{major}}$  = 22.3 min.  $^1\text{H}$  NMR (400 MHz,  $\text{CDCl}_3$ ) (ppm): 1.01 (s, 3H), 1.11 (s, 3H), 3.77 (dd, 1H,  $J$  = 4.2, 11.4 Hz), 4.69 (dd, 1H,  $J$  = 4.2, 13.2 Hz), 4.82 (dd, 1H,  $J$  = 11.4, 13.2 Hz), 7.15 (d, 2H,  $J$  = 8.2 Hz), 7.31 (d, 2H,  $J$  = 8.2 Hz), 9.49 (s, 1H).

**Racemic 3-(4-chlorophenyl)-2,2-dimethyl-4-nitrobutanal**

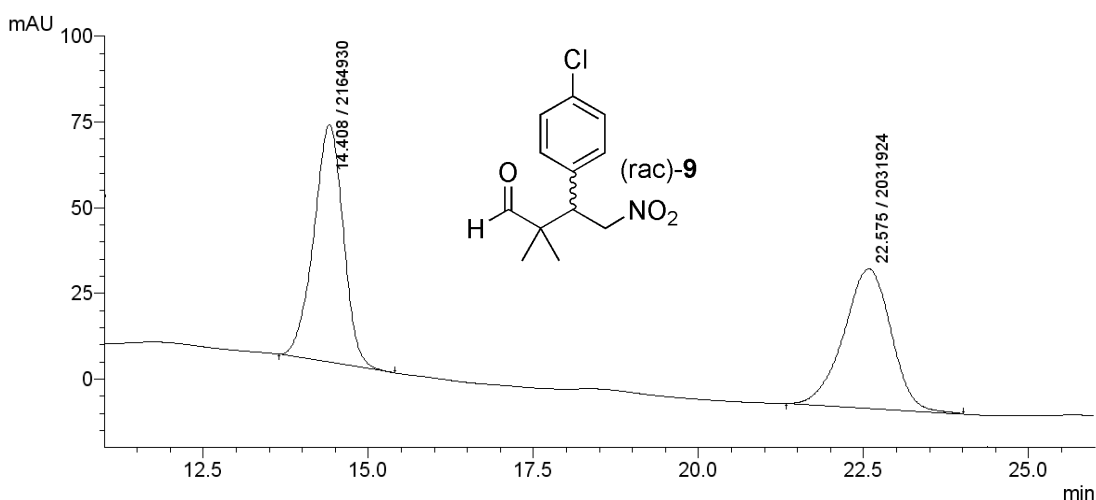

PDA Ch1 220nm 4nm

| Peak # | Ret. Time | Area    | Height | Area %  | Height % | Width at 10% Height | Mark |
|--------|-----------|---------|--------|---------|----------|---------------------|------|
| 1      | 14.408    | 2164930 | 69382  | 51.585  | 63.01    | 0.914               |      |
| 2      | 22.575    | 2031924 | 40718  | 48.415  | 36.983   | 1.447               |      |
| Total  |           | 4196854 | 110100 | 100.000 | 100.000  |                     |      |

**Enantioenriched 3-(4-chlorophenyl)-2,2-dimethyl-4-nitrobutanal**

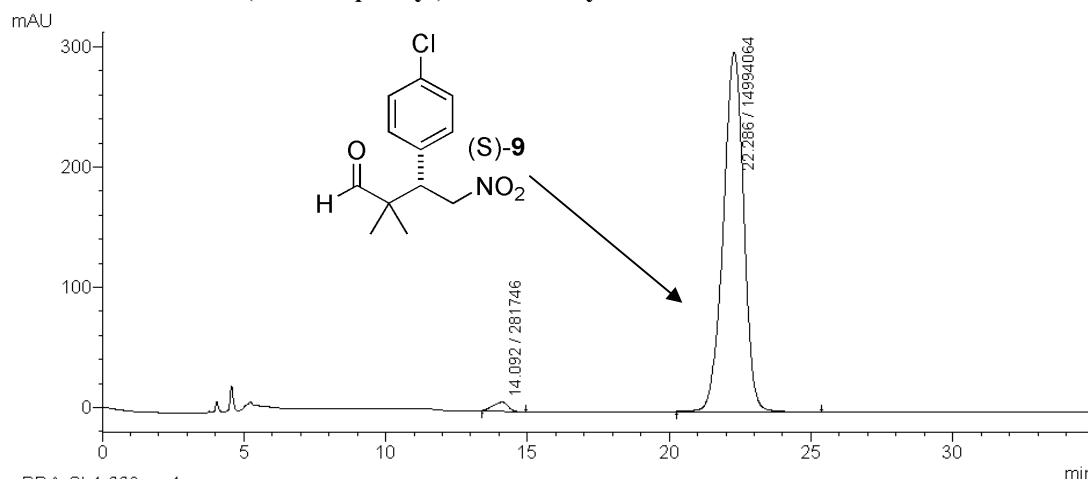

PDA Ch1 220nm 4nm

| Peak # | Ret. Time | Area     | Height | Area %  | Height % | Width at 10% Height | Mark |
|--------|-----------|----------|--------|---------|----------|---------------------|------|
| 1      | 14.092    | 281746   | 7618   | 1.844   | 2.487    | 1.038               |      |
| 2      | 22.286    | 14994064 | 298639 | 98.156  | 97.513   | 1.454               |      |
| Total  |           | 15275810 | 306257 | 100.000 | 100.000  |                     |      |

<sup>1</sup>H NMR of (S)-3-(4-chlorophenyl)-2,2-dimethyl-4-nitrobutanal (9)

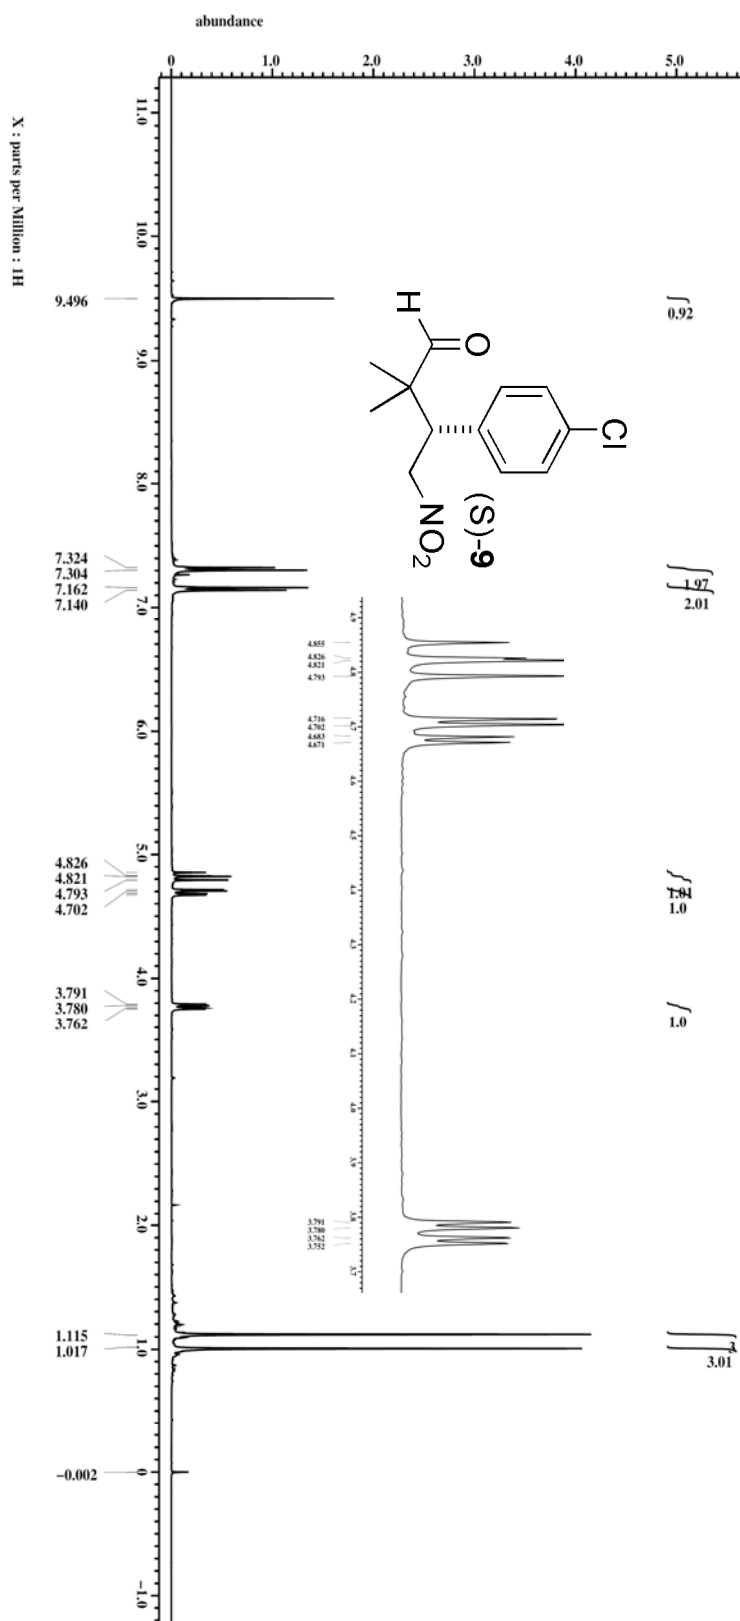

### (S)-3-(4-fluorophenyl)-2,2-dimethyl-4-nitrobutanal (**10**):

The title compound was prepared from *trans*-4-fluoro- $\beta$ -nitrostyrene and isobutyraldehyde using method B. Reaction time: 24 h; No column chromatography was required,  $^1\text{H}$  NMR (see spectrum on p. S-16) and HPLC (chromatogram on p. S-15) of the crude product showed it to be of very high chemical purity; yield = 93%; ee = 98% as determined by HPLC (CHIRALCEL OD-H, *i*-PrOH/*n*-heptane 20/80, flow rate = 1.0 mL/min,  $\lambda$  = 220 nm);  $t_{\text{minor}}$  = 10.3 min,  $t_{\text{major}}$  = 17.5 min. The compound was tentatively assigned the S configuration according to the general trend of our Michael addition products.  $^1\text{H}$  NMR (400 MHz,  $\text{CDCl}_3$ ) (ppm): 1.00 (s, 3H), 1.12 (s, 3H), 3.78 (dd, 1H,  $J$  = 4.1, 11.4 Hz), 4.69 (dd, 1H,  $J$  = 4.1, 12.8 Hz), 4.82 (dd, 1H,  $J$  = 11.4, 12.8 Hz), 6.99-7.01 (m, 2H), 7.16-7.20 (m, 2H), 9.5 (s, 1H).

### Racemic 3-(4-fluorophenyl)-2,2-dimethyl-4-nitrobutanal

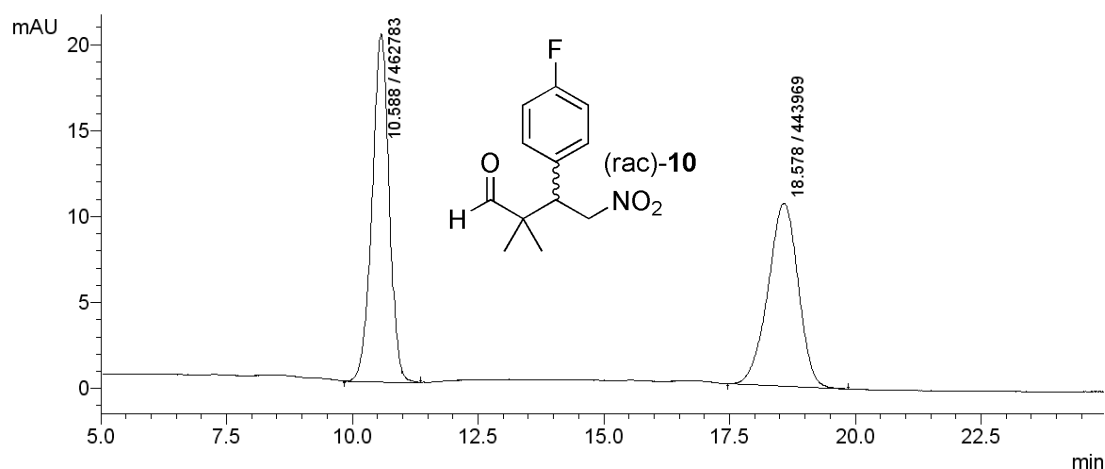

PDA Ch1 220nm 4nm

| Peak # | Ret. Time | Area   | Height | Area %  | Height % | Width at 10% Height | Mark |
|--------|-----------|--------|--------|---------|----------|---------------------|------|
| 1      | 10.588    | 462783 | 20204  | 51.037  | 65.503   | 0.671               |      |
| 2      | 18.578    | 443969 | 10641  | 48.963  | 34.497   | 1.213               |      |
| Total  |           | 906752 | 30845  | 100.000 | 100.000  |                     |      |

### Enantioenriched 3-(4-fluorophenyl)-2,2-dimethyl-4-nitrobutanal

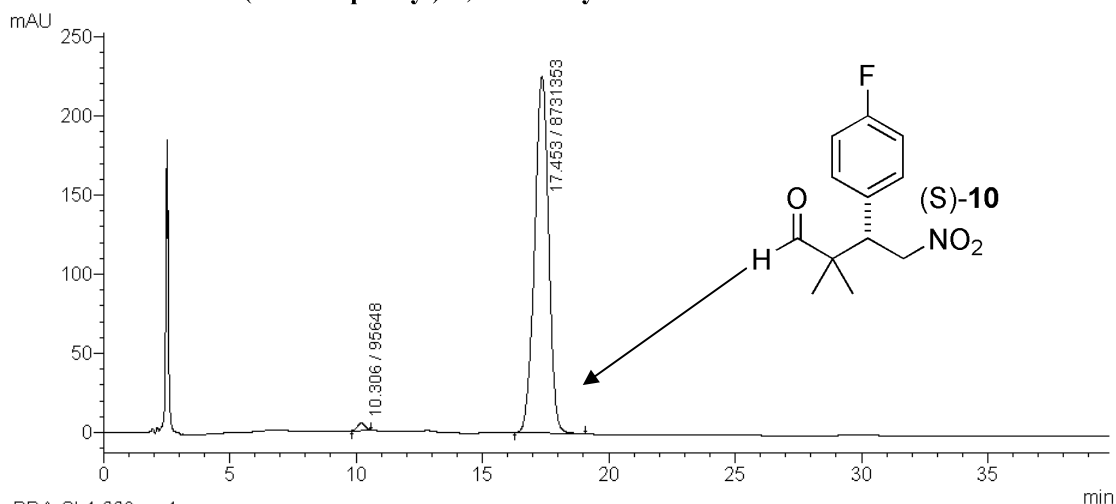

PDA Ch1 220nm 4nm

| Peak # | Ret. Time | Area    | Height | Area %  | Height % | Width at 10% Height | Mark |
|--------|-----------|---------|--------|---------|----------|---------------------|------|
| 1      | 10.306    | 95648   | 4685   | 1.084   | 2.036    | 0.602               |      |
| 2      | 17.453    | 8731353 | 225368 | 98.916  | 97.964   | 1.127               |      |
| Total  |           | 8827001 | 230053 | 100.000 | 100.000  |                     |      |



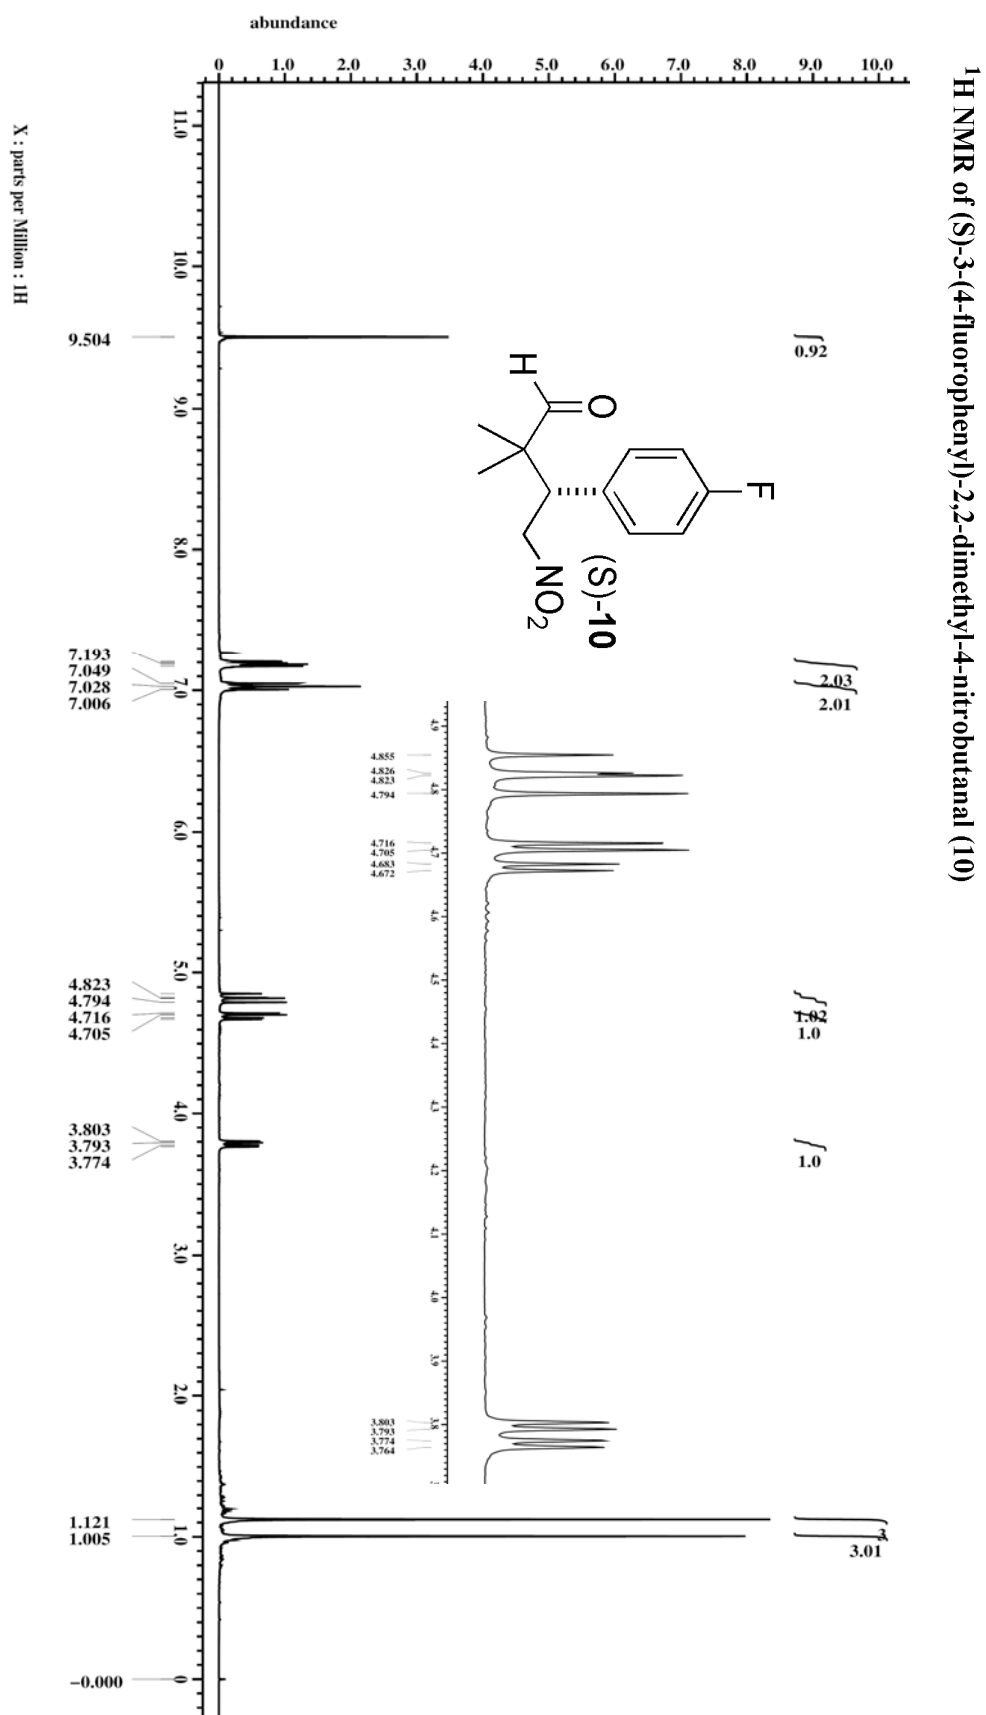

**(R)-3-(2-bromophenyl)-2,2-dimethyl-4-nitrobutanal (11):**

The title compound was prepared from *trans*-2-bromo- $\beta$ -nitrostyrene and isobutyraldehyde using method B. Reaction time: 24 h; No column chromatography was required,  $^1\text{H}$  NMR (see spectrum on p. S-18) and HPLC (chromatogram on p. S-17) of the crude product showed it to be of very high chemical purity; yield = 88%; ee = 96% as determined by HPLC (CHIRALCEL OD-H, *i*-PrOH/n-heptane 20/80, flow rate = 1.0 mL/min,  $\lambda$  = 200 nm);  $t_{\text{minor}}$  = 11.4 min,  $t_{\text{major}}$  = 30.7 min.  $^1\text{H}$  NMR (400 MHz,  $\text{CDCl}_3$ ) (ppm): 1.09 (s, 3H), 1.17 (s, 3H), 4.62 (dd, 1H,  $J$  = 4.1, 11.4 Hz), 4.71 (dd, 1H,  $J$  = 4.1, 13.3 Hz), 4.83 (dd, 1H,  $J$  = 11.4, 13.3 Hz), 7.13-7.17 (m, 1H), 7.26-7.34 (m, 2H), 7.61 (d, 1H,  $J$  = 7.3Hz) 9.56 (s, 1H).

**Racemic 3-(2-bromophenyl)-2,2-dimethyl-4-nitrobutanal**

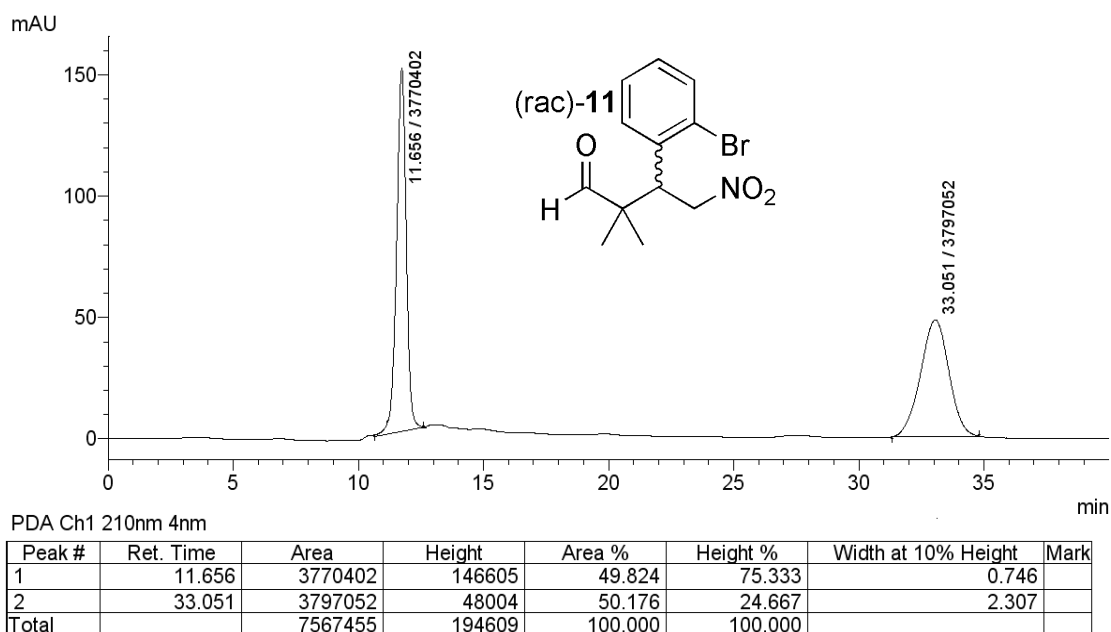

**Enantioenriched 3-(2-bromophenyl)-2,2-dimethyl-4-nitrobutanal**

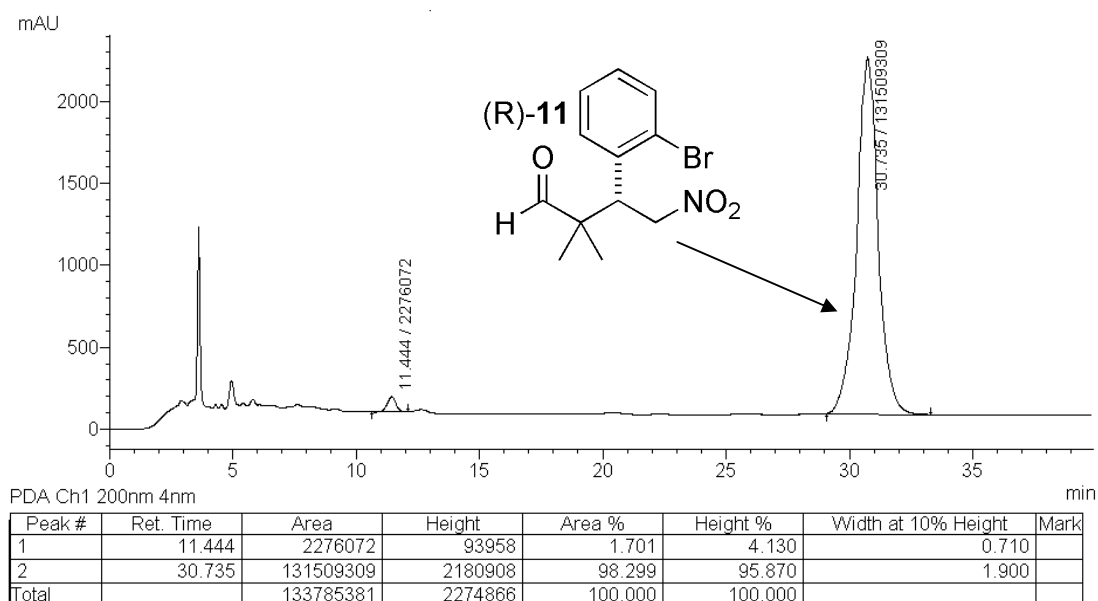

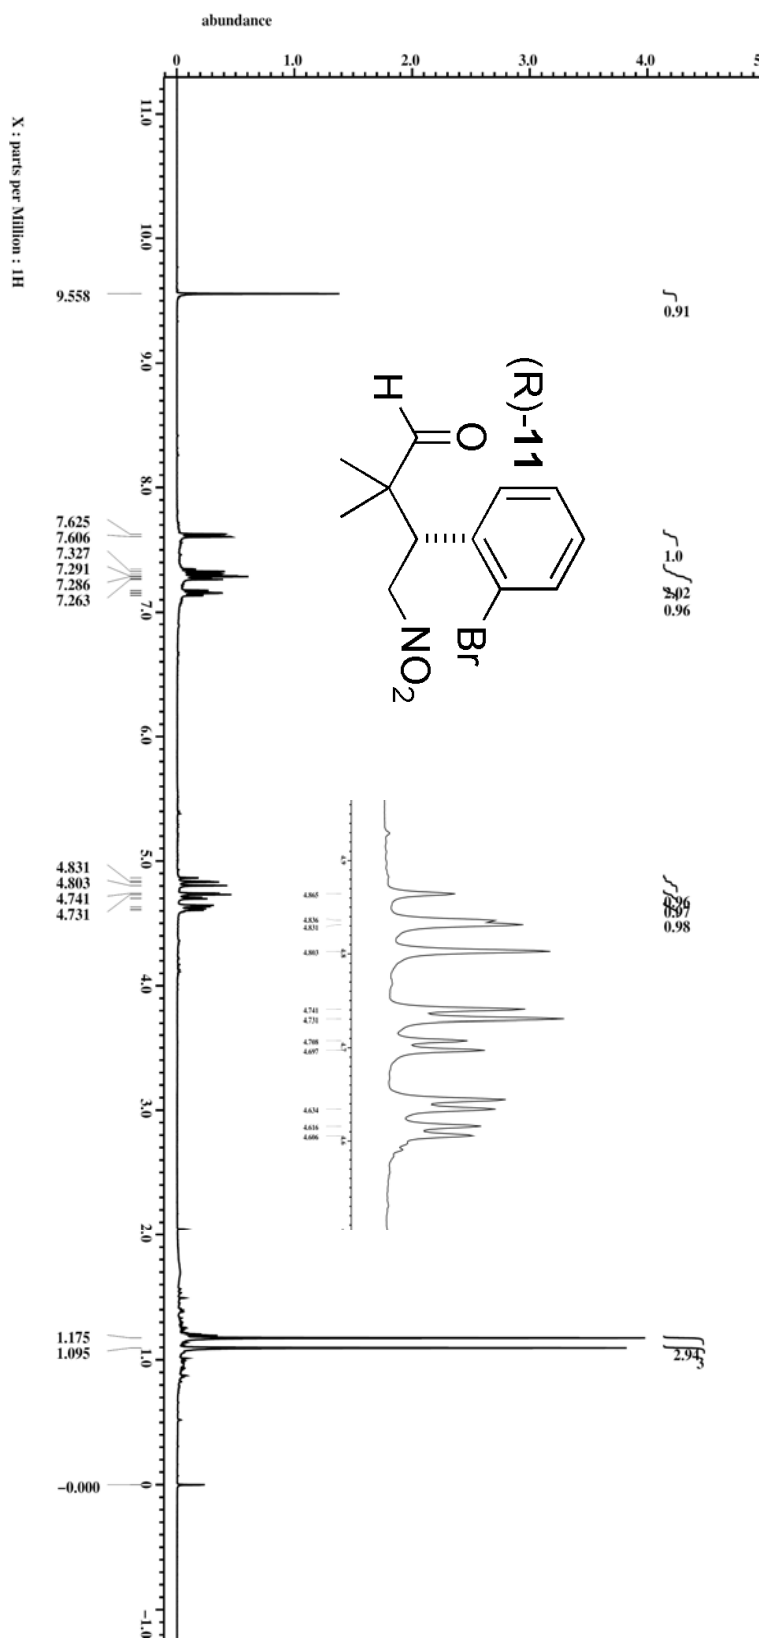

<sup>1</sup>H NMR of (R)-3-(2-bromophenyl)-2,2-dimethyl-4-nitrobutanal (11)

### (S)-2,2-dimethyl-4-nitro-3-p-tolylbutanal (**12**):

The title compound was prepared from *trans*-4-methyl- $\beta$ -nitrostyrene and isobutyraldehyde using method B. Reaction time: 24 h; flash column chromatography: (EtOAc/Pet ether = 7:93); yield = 85%; ee = 99% as /min,  $\lambda$  = 220 nm); determined by HPLC (CHIRALCEL OD-H, *i*-PrOH/n-heptane 20/80, flow rate = 1.0 mL/min,  $t_{\text{minor}}$  = 10.2 min,  $t_{\text{major}}$  = 13.9 min.  $^1\text{H NMR}$  (400 MHz,  $\text{CDCl}_3$ ) (ppm): 0.98 (s, 3H), 1.12 (s, 3H), 2.31 (s, 3H), 3.74 (dd, 1H,  $J$  = 4.1, 11.4 Hz), 4.66 (dd, 1H,  $J$  = 4.1, 12.8 Hz), 4.82 (dd, 1H,  $J$  = 11.4, 12.8 Hz), 7.07 (d, 2H,  $J$  = 8.2 Hz), 7.12 (d, 2H,  $J$  = 8.2 Hz), 9.51 (s, 1H).

### Racemic 2,2-dimethyl-4-nitro-3-p-tolylbutanal

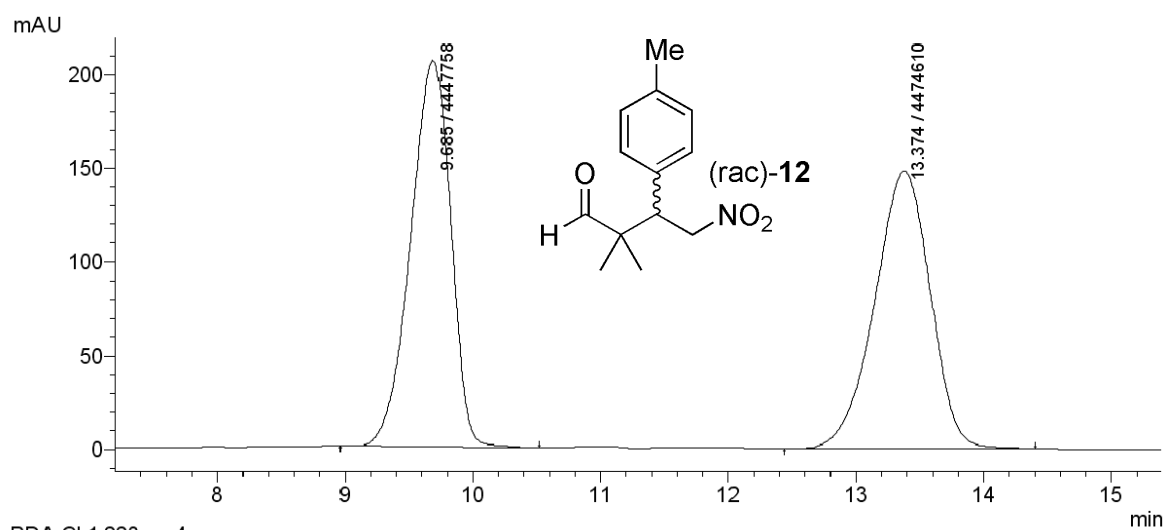

PDA Ch1 220nm 4nm

| Peak # | Ret. Time | Area    | Height | Area %  | Height % | Width at 10% Height | Mark |
|--------|-----------|---------|--------|---------|----------|---------------------|------|
| 1      | 9.685     | 4447758 | 206001 | 49.850  | 58.167   | 0.612               |      |
| 2      | 13.374    | 4474610 | 148151 | 50.150  | 41.833   | 0.870               |      |
| Total  |           | 8922368 | 354152 | 100.000 | 100.000  |                     |      |

### Enantioenriched 2,2-dimethyl-4-nitro-3-p-tolylbutanal

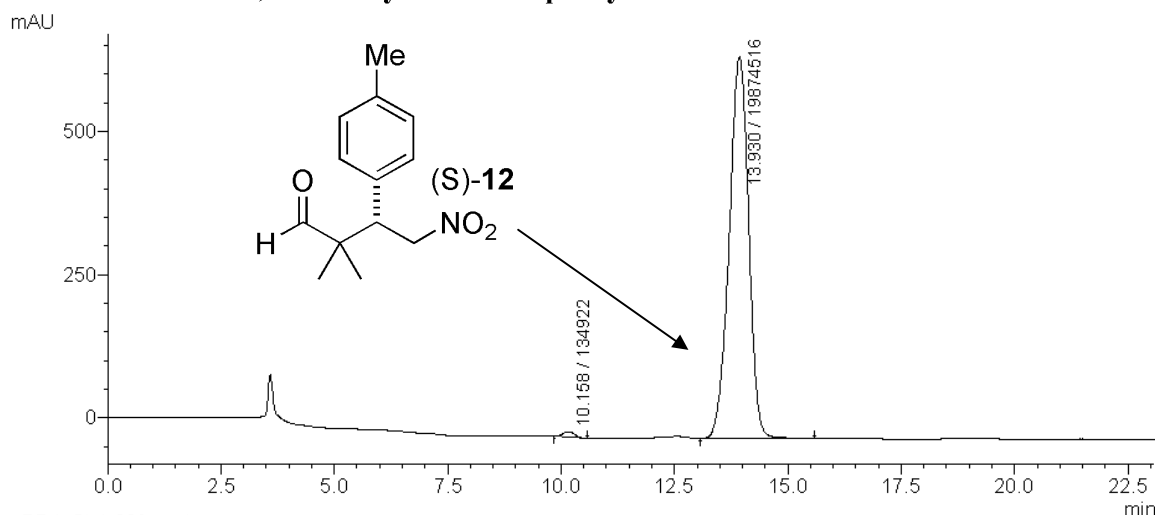

PDA Ch1 220nm 4nm

| Peak # | Ret. Time | Area     | Height | Area %  | Height % | Width at 10% Height | Mark |
|--------|-----------|----------|--------|---------|----------|---------------------|------|
| 1      | 10.158    | 134922   | 8658   | 0.674   | 1.284    | 0.434               |      |
| 2      | 13.930    | 19874516 | 665829 | 99.326  | 98.716   | 0.858               |      |
| Total  |           | 20009438 | 674487 | 100.000 | 100.000  |                     |      |

<sup>1</sup>H NMR of (S)-2,2-dimethyl-4-nitro-3-p-tolylbutanal (12)

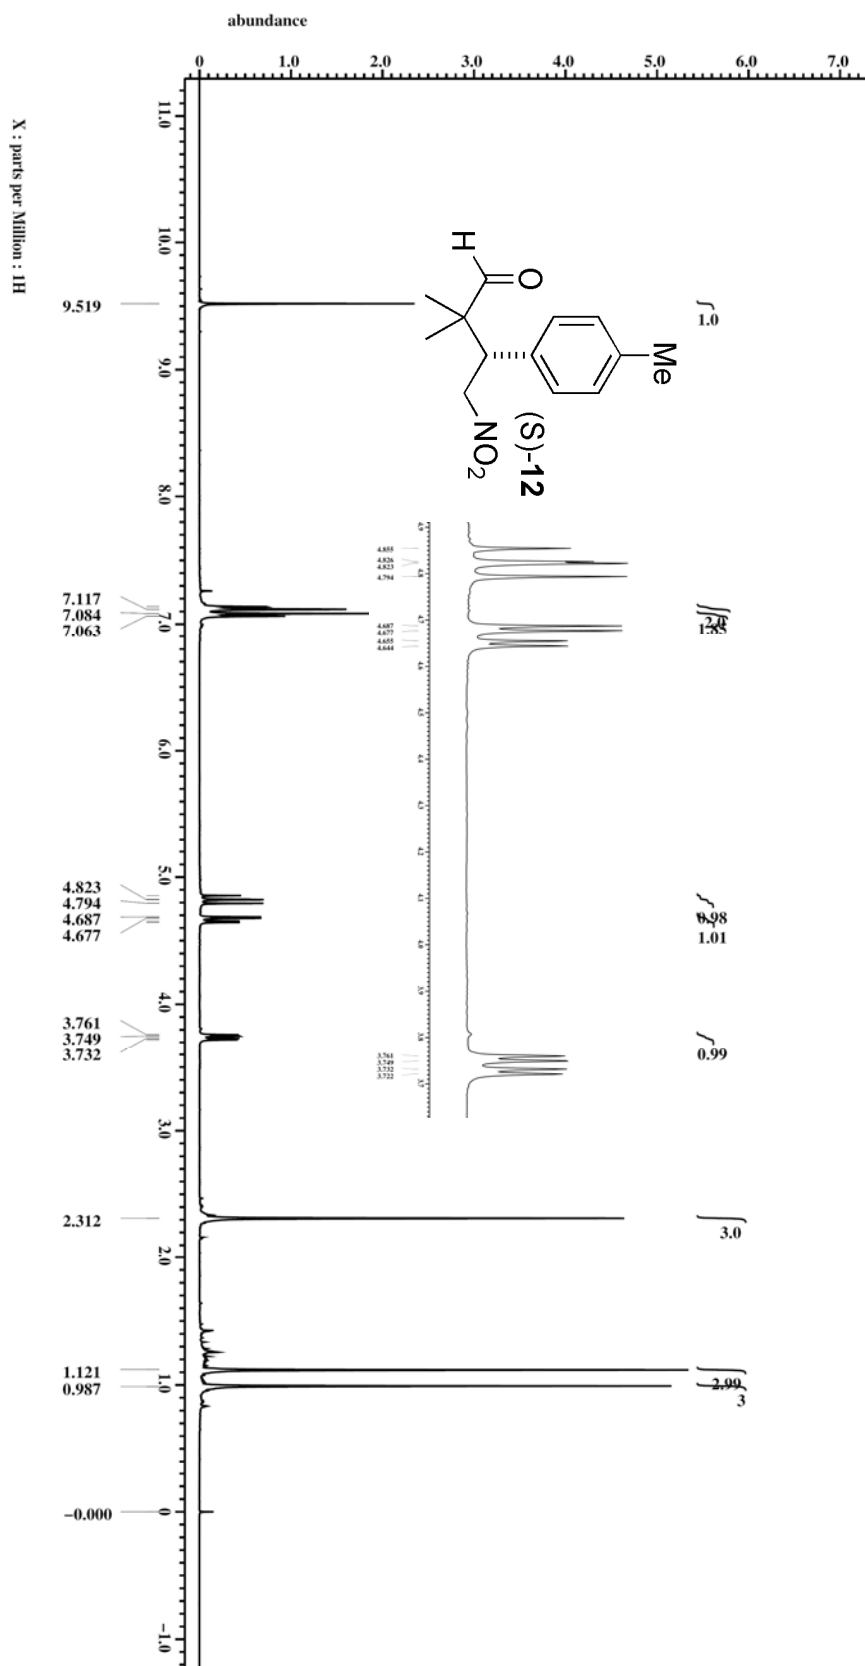

**(S)-3-(4-methoxyphenyl)-2,2-dimethyl-4-nitrobutanal (13):**

The title compound was prepared from *trans*-2-methoxy- $\beta$ -nitrostyrene and isobutyraldehyde using method B. Reaction time: 24 h; flash column chromatography: (EtOAc/Pet ether = 7:93); yield = 90%; ee = 98% as determined by HPLC (CHIRALCEL OD-H, *i*-PrOH/n-heptane 10/90, flow rate = 1.0 mL/min,  $\lambda$  = 220 nm);  $t_{\text{minor}}$  = 11.9 min,  $t_{\text{major}}$  = 17.3 min.  $^1\text{H}$  NMR (400 MHz,  $\text{CDCl}_3$ ) (ppm): 0.99 (s, 3H), 1.11 (s, 3H), 3.72 (dd, 1H,  $J$  = 4.1, 11.5 Hz), 3.78 (s, 3H), 4.66 (dd, 1H,  $J$  = 4.1, 12.8 Hz), 4.80 (dd, 1H,  $J$  = 11.5, 12.8 Hz), 6.85 (d, 2H,  $J$  = 8.7 Hz), 7.11 (d, 2H,  $J$  = 8.7 Hz), 9.51 (s, 1H).

**Racemic 3-(4-methoxyphenyl)-2,2-dimethyl-4-nitrobutanal**

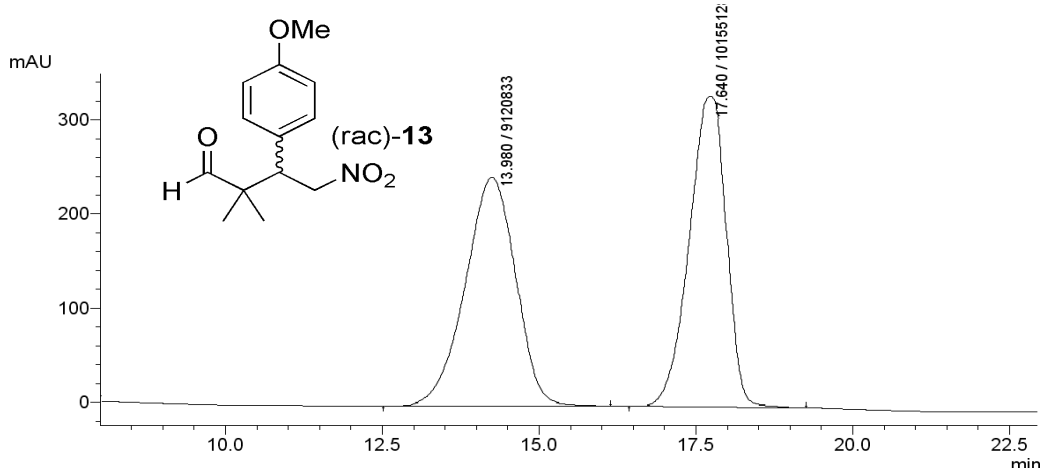

PDA Ch1 220nm 4nm

| Peak # | Ret. Time | Area     | Height | Area %  | Height % | Width at 10% Height | Mark |
|--------|-----------|----------|--------|---------|----------|---------------------|------|
| 1      | 13.980    | 9120833  | 195940 | 47.317  | 44.914   | 1.359               |      |
| 2      | 17.640    | 10155128 | 240320 | 52.683  | 55.086   | 1.229               |      |
| Total  |           | 19275961 | 436261 | 100.000 | 100.000  |                     |      |

**Enantioenriched 3-(4-methoxyphenyl)-2,2-dimethyl-4-nitrobutanal**

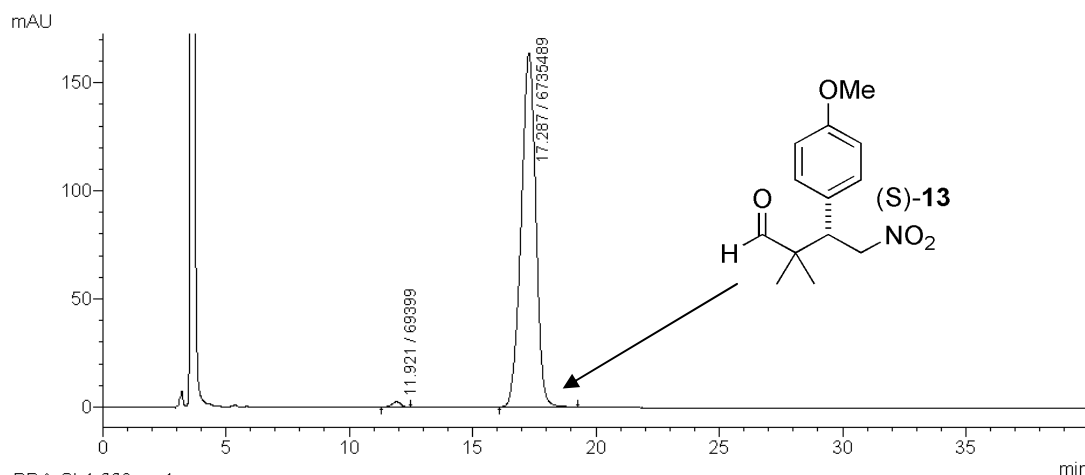

PDA Ch1 220nm 4nm

| Peak # | Ret. Time | Area    | Height | Area %  | Height % | Width at 10% Height | Mark |
|--------|-----------|---------|--------|---------|----------|---------------------|------|
| 1      | 11.921    | 69399   | 2595   | 1.020   | 1.561    | 0.776               |      |
| 2      | 17.287    | 6735489 | 163659 | 98.980  | 98.439   | 1.195               |      |
| Total  |           | 6804888 | 166254 | 100.000 | 100.000  |                     |      |

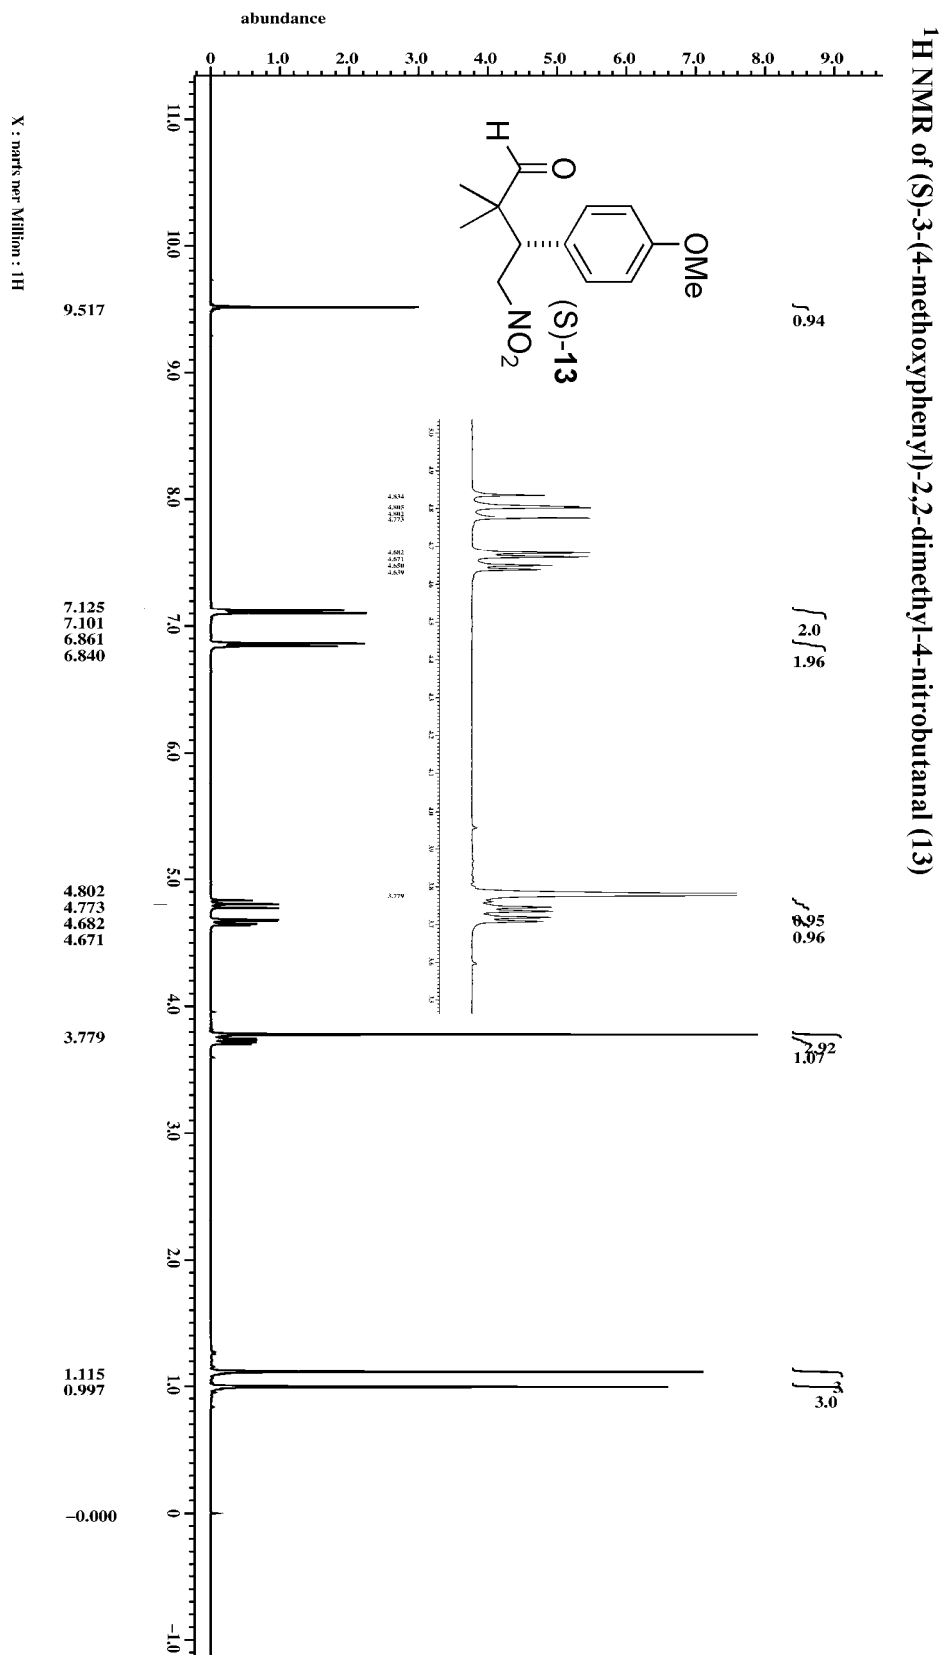

**(S)-3-(2-methoxyphenyl)-2,2-dimethyl-4-nitrobutanal (14):**

The title compound was prepared from *trans*-2-methoxy- $\beta$ -nitrostyrene and isobutyraldehyde according to general procedure B. Reaction time: 36 h; flash column chromatography: (EtOAc/Pet ether = 7:93); yield = 72% ; ee = 96% as determined by HPLC (CHIRALCEL OD-H, *i*-PrOH/n-heptane 20/80, flow rate = 1.0 mL/min,  $\lambda$  = 220 nm);  $t_{\text{minor}}$  = 8.2 min,  $t_{\text{major}}$  = 12.9 min.  $^1\text{H}$  NMR (400 MHz,  $\text{CDCl}_3$ ) (ppm): 1.05 (s, 3H), 1.10 (s, 3H), 3.82 (s, 3H), 4.10-4.27 (m, 1H), 4.73 (dd, 1H,  $J$  = 4.6, 12.8 Hz), 4.90 (dd, 1H,  $J$  = 11.0, 12.8 Hz), 6.89 (d, 1H,  $J$  = 7.7 Hz), 6.93 (t, 1H,  $J$  = 7.5 Hz), 7.13 (dd, 1H,  $J$  = 1.4, 7.7 Hz), 7.24-7.28 (m, 1H), 9.50 (s, 1H).

**Racemic 3-(2-methoxyphenyl)-2,2-dimethyl-4-nitrobutanal**

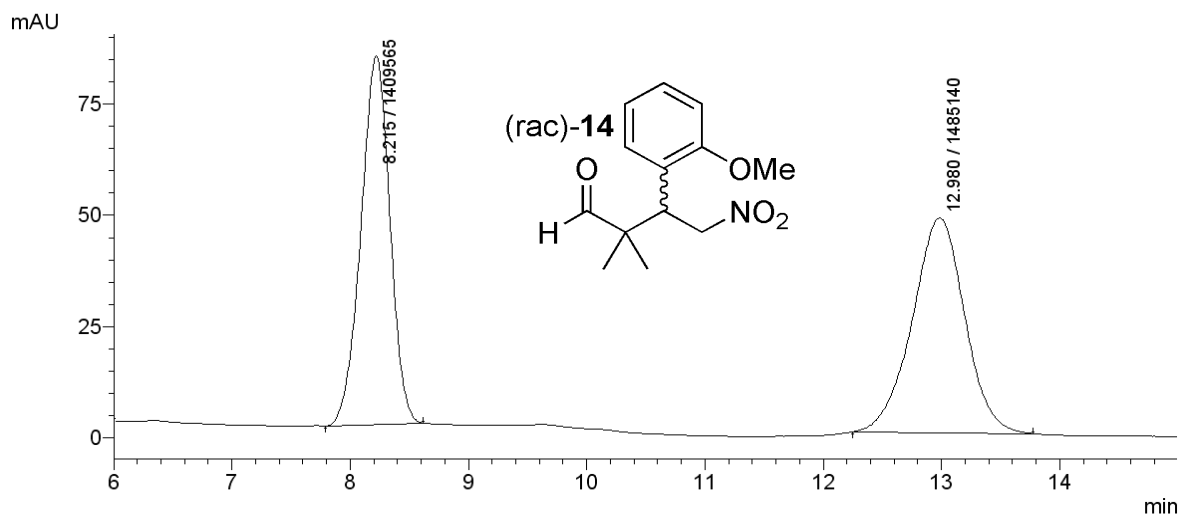

PDA Ch1 220nm 4nm

| Peak # | Ret. Time | Area    | Height | Area %  | Height % | Width at 10% Height | Mark |
|--------|-----------|---------|--------|---------|----------|---------------------|------|
| 1      | 8.215     | 1409565 | 82738  | 48.695  | 63.172   | 0.499               |      |
| 2      | 12.980    | 1485140 | 48234  | 51.305  | 36.828   | 0.914               |      |
| Total  |           | 2894705 | 130972 | 100.000 | 100.000  |                     |      |

**Enantioenriched 3-(2-methoxyphenyl)-2,2-dimethyl-4-nitrobutanal**

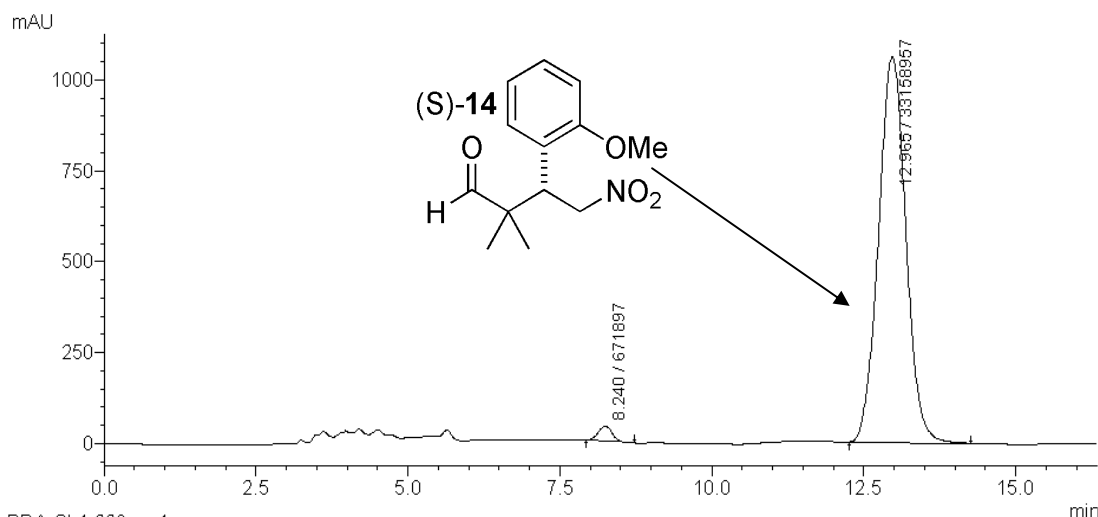

PDA Ch1 220nm 4nm

| Peak # | Ret. Time | Area     | Height  | Area %  | Height % | Width at 10% Height | Mark |
|--------|-----------|----------|---------|---------|----------|---------------------|------|
| 1      | 8.240     | 671897   | 42117   | 1.986   | 3.818    | 0.458               |      |
| 2      | 12.965    | 33158957 | 1060869 | 98.014  | 96.182   | 0.906               |      |
| Total  |           | 33830854 | 1102986 | 100.000 | 100.000  |                     |      |



<sup>1</sup>H NMR of (S)-3-(2-methoxyphenyl)-2,2-dimethyl-4-nitrobutanal (14)

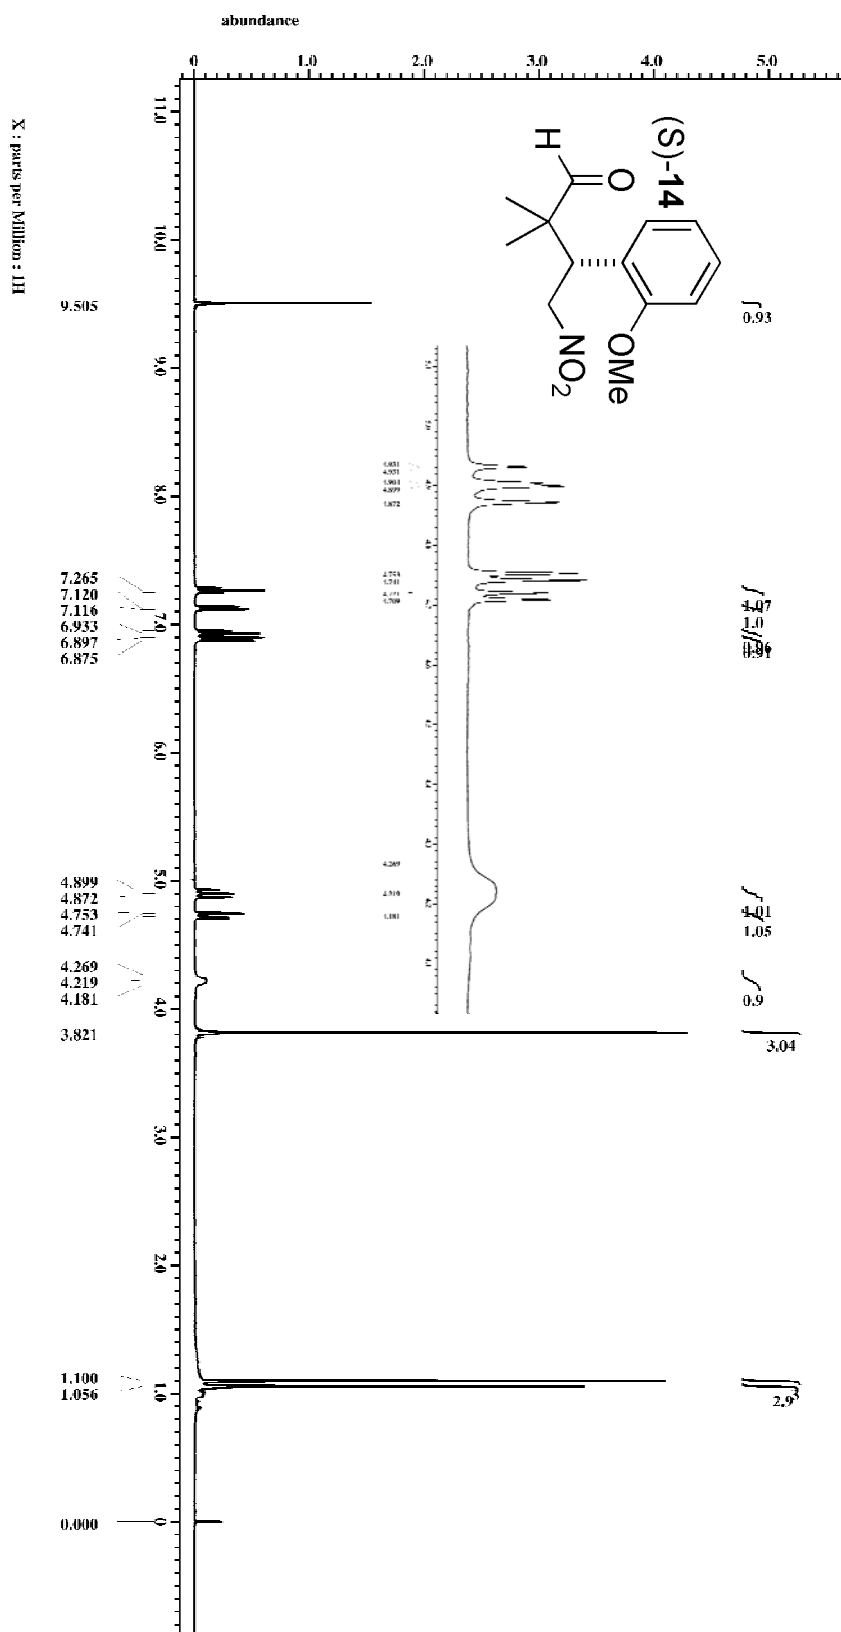

**(S)-3-(furan-2-yl)-2,2-dimethyl-4-nitrobutanal (15):**

The title compound was prepared from 2-(2-nitrovinyl)furan and isobutyraldehyde using method B. Reaction time: 10 h; No column chromatography was required,  $^1\text{H}$  NMR (see spectrum on p. S-26) and HPLC (chromatogram on p. S-25) of the crude product showed it to be of very high chemical purity; yield = 98%; ee = 98% as determined by HPLC (CHIRALCEL OD-H, *i*-PrOH/*n*-heptane 25/75, flow rate = 0.8 mL/min,  $\lambda$  = 220 nm);  $t_{\text{minor}}$  = 9.4 min,  $t_{\text{major}}$  = 14.2 min.

$^1\text{H}$  NMR (400 MHz,  $\text{CDCl}_3$ ) (ppm): 1.05 (s, 3H), 1.18 (s, 3H), 3.91 (dd, 1H,  $J$  = 3.7, 11.0 Hz), 4.58 (dd, 1H,  $J$  = 3.7, 12.8 Hz), 4.75 (dd, 1H,  $J$  = 11.0, 12.8 Hz), 6.22 (d, 1H,  $J$  = 3.2), 6.31 (dd, 1H,  $J$  = 1.8, 3.2 Hz), 7.36 (d, 1H,  $J$  = 1.8 Hz), 9.52 (s, 1H).

**Racemic 3-(furan-2-yl)-2,2-dimethyl-4-nitrobutanal**

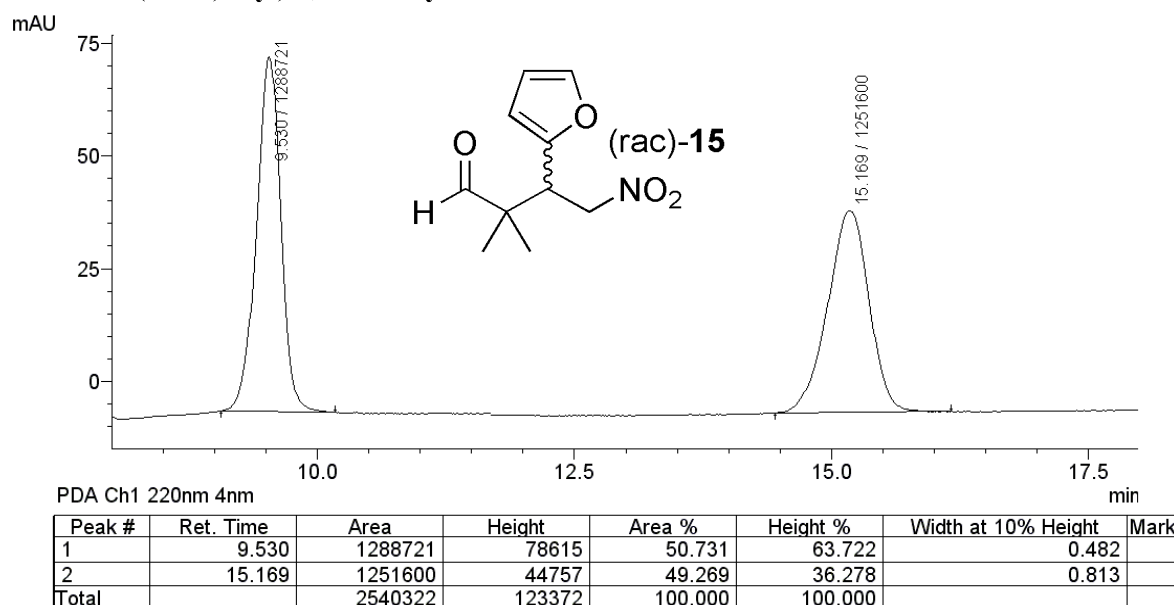

**Enantioenriched 3-(furan-2-yl)-2,2-dimethyl-4-nitrobutanal**

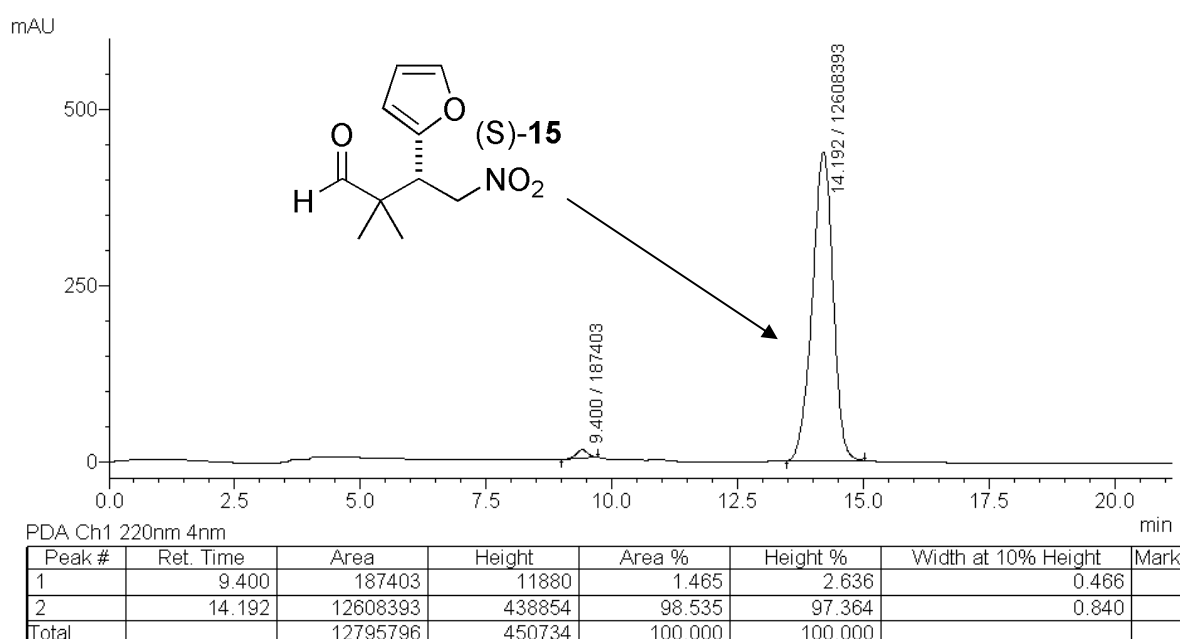

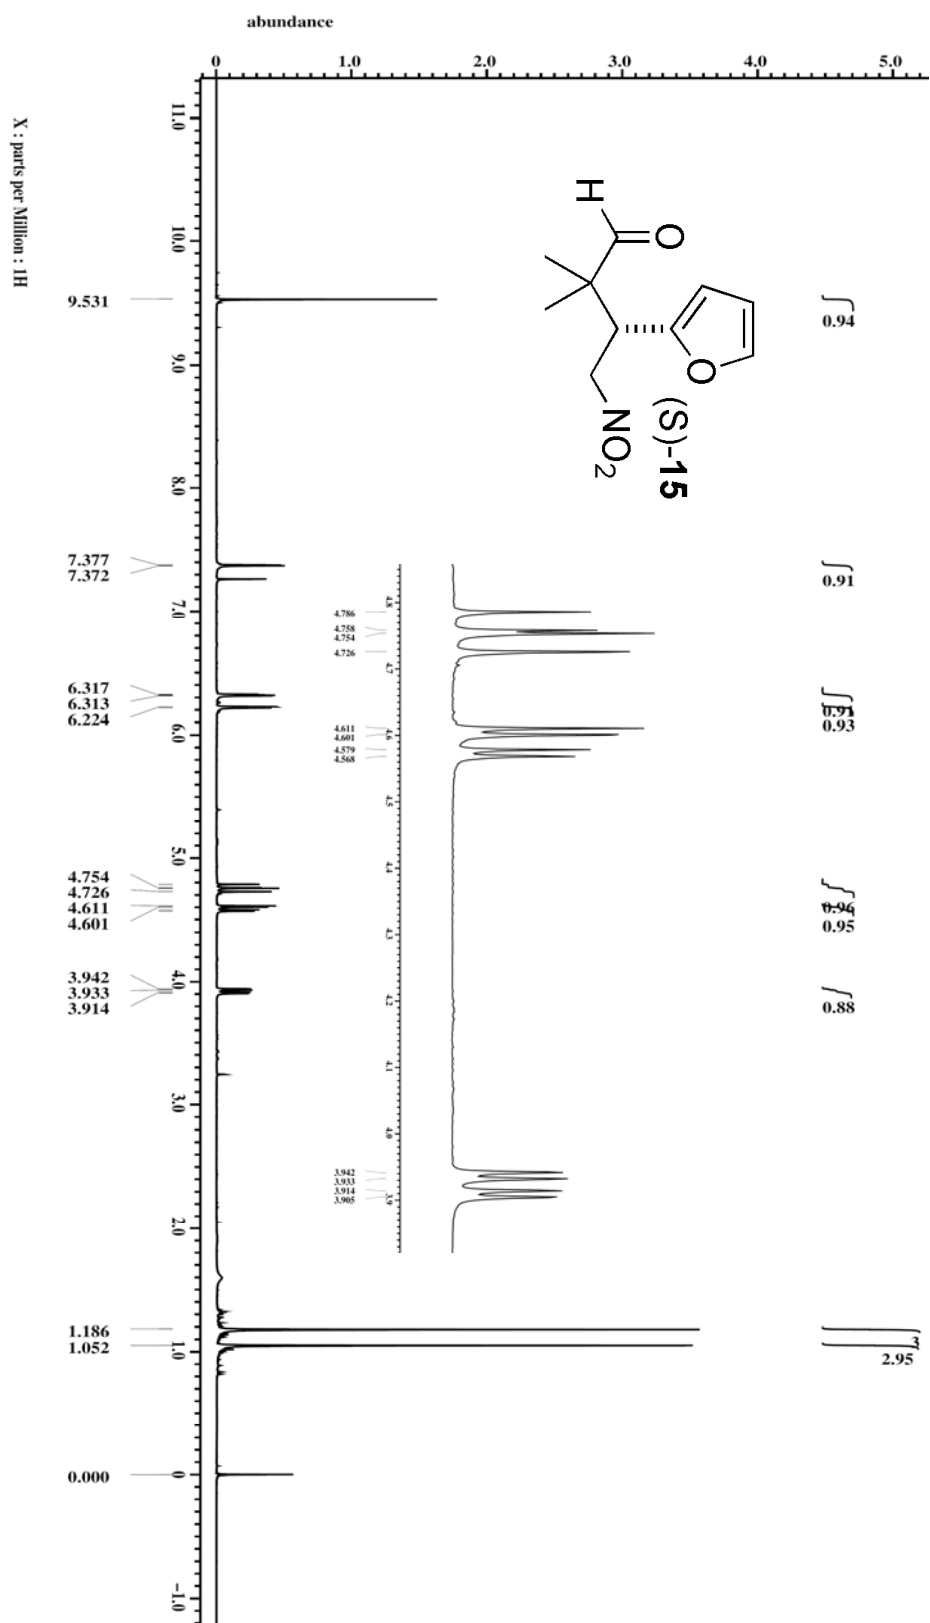

**(2S)-2,2,5-trimethyl-3-nitromethyl-hexanal (16):**

The title compound was prepared from 2-isobutyl-1-nitroethene and isobutyraldehyde using method B. Reaction time: 36 h; flash column chromatography: (EtOAc/Pet ether = 7:93); yield = 70%; ee = 96% as determined by HPLC (CHIRALCEL OD-H, *i*-PrOH/n-heptane 10/90, flow rate = 0.4 mL/min,  $\lambda$  = 220 nm);  $t_{\text{minor}}$  = 13.9 min,  $t_{\text{major}}$  = 16.9 min.  $^1\text{H NMR}$  (400 MHz,  $\text{CDCl}_3$ ) (ppm): 0.90 (d, 3H,  $J$  = 5.8 Hz), 0.91 (d, 3H,  $J$  = 5.8 Hz), 1.06 (s, 3H), 1.07 (s, 3H), 1.09-1.16 (m, 1H), 1.21-1.30 (m, 1H), 2.62-2.68 (m, 1H), 4.23 (dd, 1H,  $J$  = 5.4, 13.0 Hz), 4.44 (dd, 1H,  $J$  = 5.4, 13.0 Hz), 9.43 (s, 1H).

**Racemic 2,2,5-trimethyl-3-nitromethyl-hexanal**

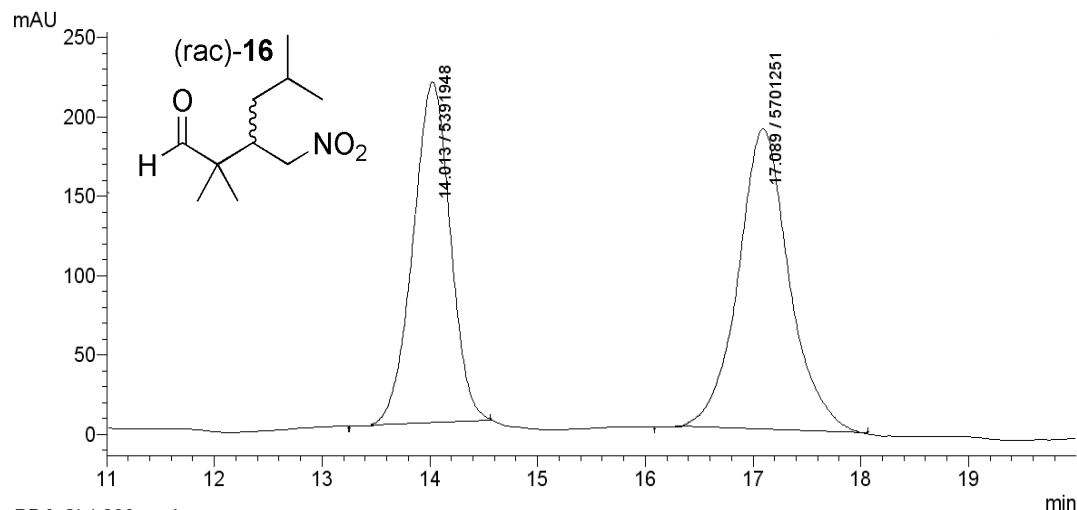

PDA Ch1 220nm 4nm

| Peak # | Ret. Time | Area     | Height | Area %  | Height % | Width at 10% Height | Mark |
|--------|-----------|----------|--------|---------|----------|---------------------|------|
| 1      | 14.013    | 5391948  | 215623 | 48.606  | 54.035   | 0.000               |      |
| 2      | 17.089    | 5701251  | 183417 | 51.394  | 45.965   | 0.950               |      |
| Total  |           | 11093199 | 399040 | 100.000 | 100.000  |                     |      |

**Enantioenriched 2,2,5-trimethyl-3-nitromethyl-hexanal**

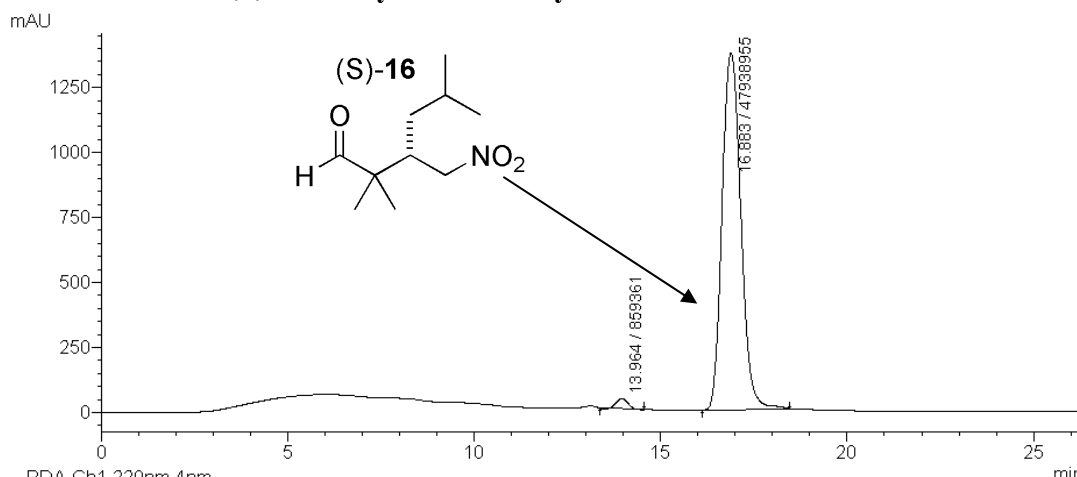

PDA Ch1 220nm 4nm

| Peak # | Ret. Time | Area     | Height  | Area %  | Height % | Width at 10% Height | Mark |
|--------|-----------|----------|---------|---------|----------|---------------------|------|
| 1      | 13.964    | 859361   | 40614   | 1.761   | 2.876    | 0.613               |      |
| 2      | 16.883    | 47938955 | 1371442 | 98.239  | 97.124   | 0.969               |      |
| Total  |           | 48798316 | 1412056 | 100.000 | 100.000  |                     |      |

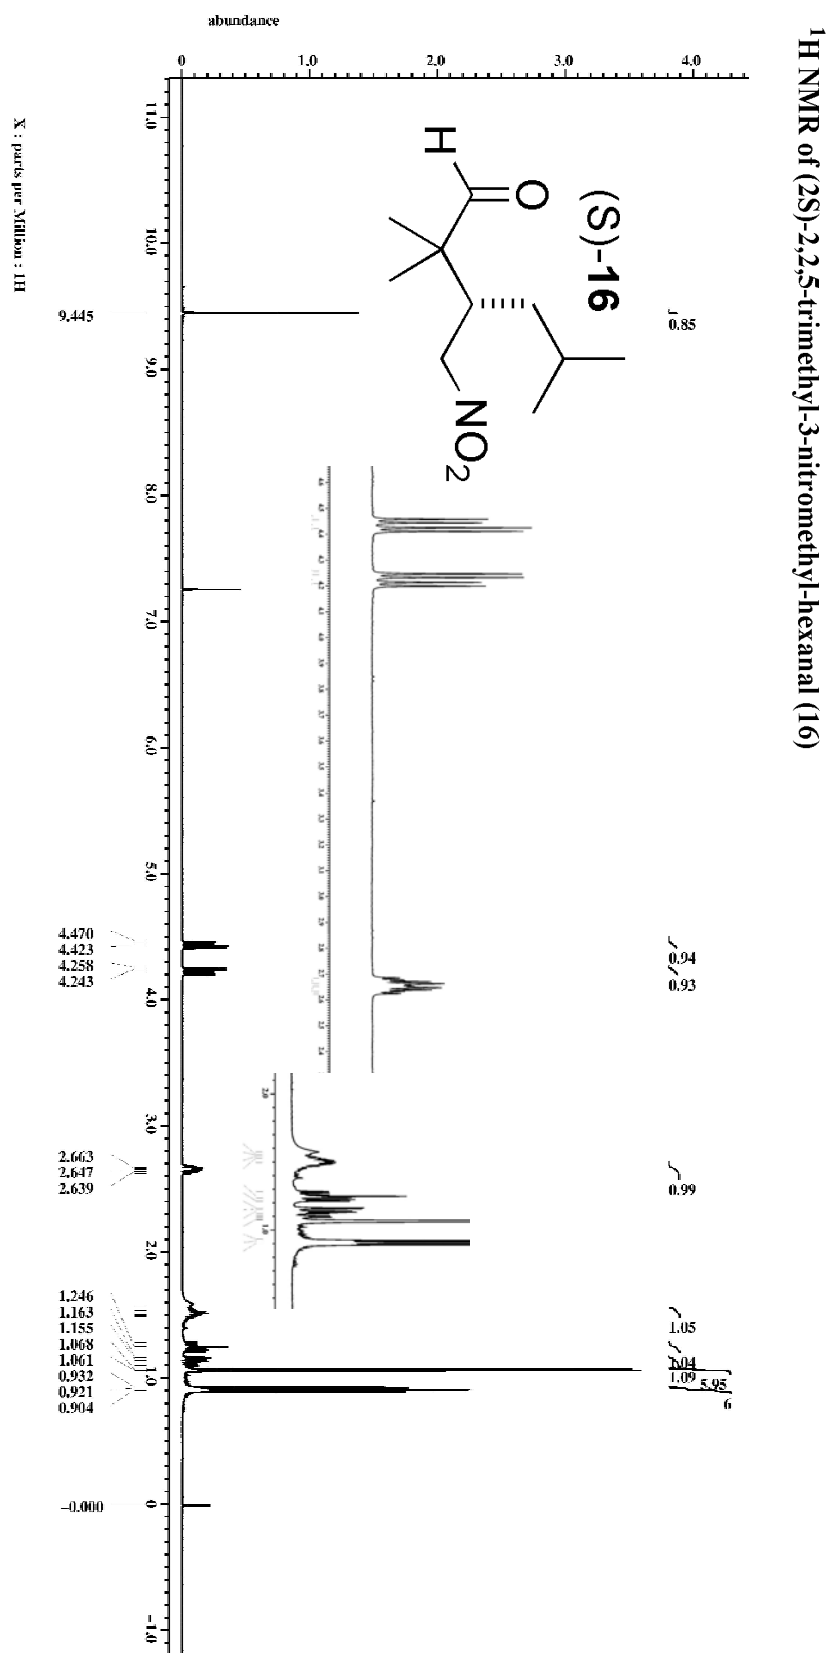

**(S)-E-2,2-dimethyl-3-(nitromethyl)-5-phenylpent-4-enal (17):**

The title compound was prepared from (1E,2E)-4-nitrobuta-1,3-dienylbenzene and isobutyraldehyde using method B. Reaction time: 6 h; No column chromatography was required, <sup>1</sup>H NMR (see spectrum on p. S-30) and HPLC (chromatogram on p. S-29) of the crude product showed it to be of very high chemical purity; yield = 98%; ee = 97% as determined by HPLC (CHIRALCEL OD-H, *i*-PrOH/*n*-heptane 20/80, flow rate = 0.8 mL/min, λ = 220 nm); *t*<sub>minor</sub> = 14.7 min, *t*<sub>major</sub> = 16.3 min. <sup>1</sup>H NMR (400 MHz, CDCl<sub>3</sub>) (ppm): 1.16 (s, 3H), 1.17 (s, 3H), 3.28 (dt, 1H, *J* = 4.1, 10.5 Hz), 4.45-4.48 (m, 1H), 4.51 (dd, 1H, *J* = 4.1, 12 Hz), 6.01 (dd, 1H, *J* = 10.1, 15.8 Hz), 6.53 (d, 1H, *J* = 15.8 Hz), 7.21-7.35 (m, 5H), 9.51 (s, 1H).

**Racemic E-2,2-dimethyl-3-(nitromethyl)-5-phenylpent-4-enal**

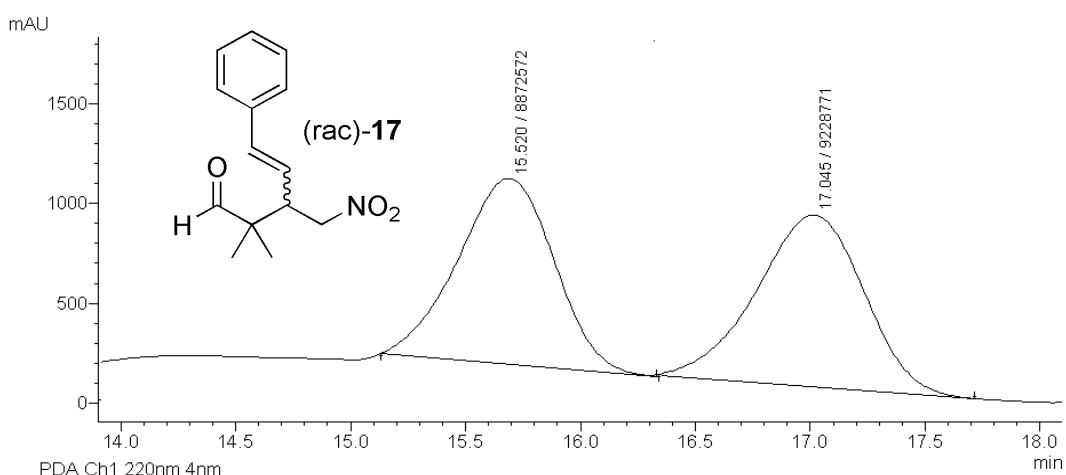

| Peak # | Ret. Time | Area     | Height | Area %  | Height % | Width at 10% Height | Mark |
|--------|-----------|----------|--------|---------|----------|---------------------|------|
| 1      | 15.520    | 8872572  | 322497 | 49.016  | 51.918   | 0.792               |      |
| 2      | 17.045    | 9228771  | 298675 | 50.984  | 48.082   | 0.897               |      |
| Total  |           | 18101343 | 621171 | 100.000 | 100.000  |                     |      |

**Enantioenriched E-2,2-dimethyl-3-(nitromethyl)-5-phenylpent-4-enal**

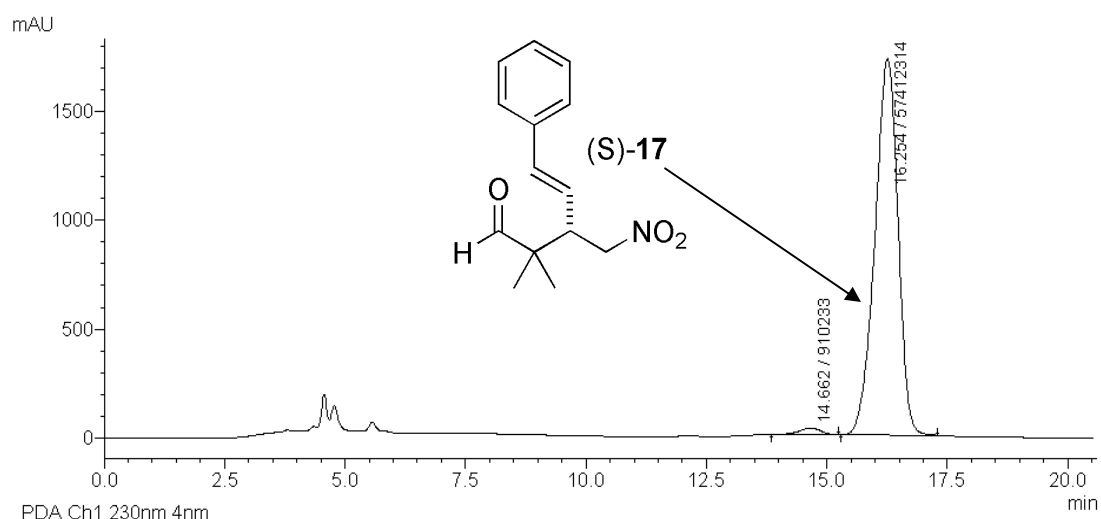

| Peak # | Ret. Time | Area     | Height  | Area %  | Height % | Width at 10% Height | Mark |
|--------|-----------|----------|---------|---------|----------|---------------------|------|
| 1      | 14.662    | 910233   | 30161   | 1.561   | 1.714    | 0.882               |      |
| 2      | 16.254    | 57412314 | 1729030 | 98.439  | 98.286   | 0.963               |      |
| Total  |           | 58322546 | 1759191 | 100.000 | 100.000  |                     |      |

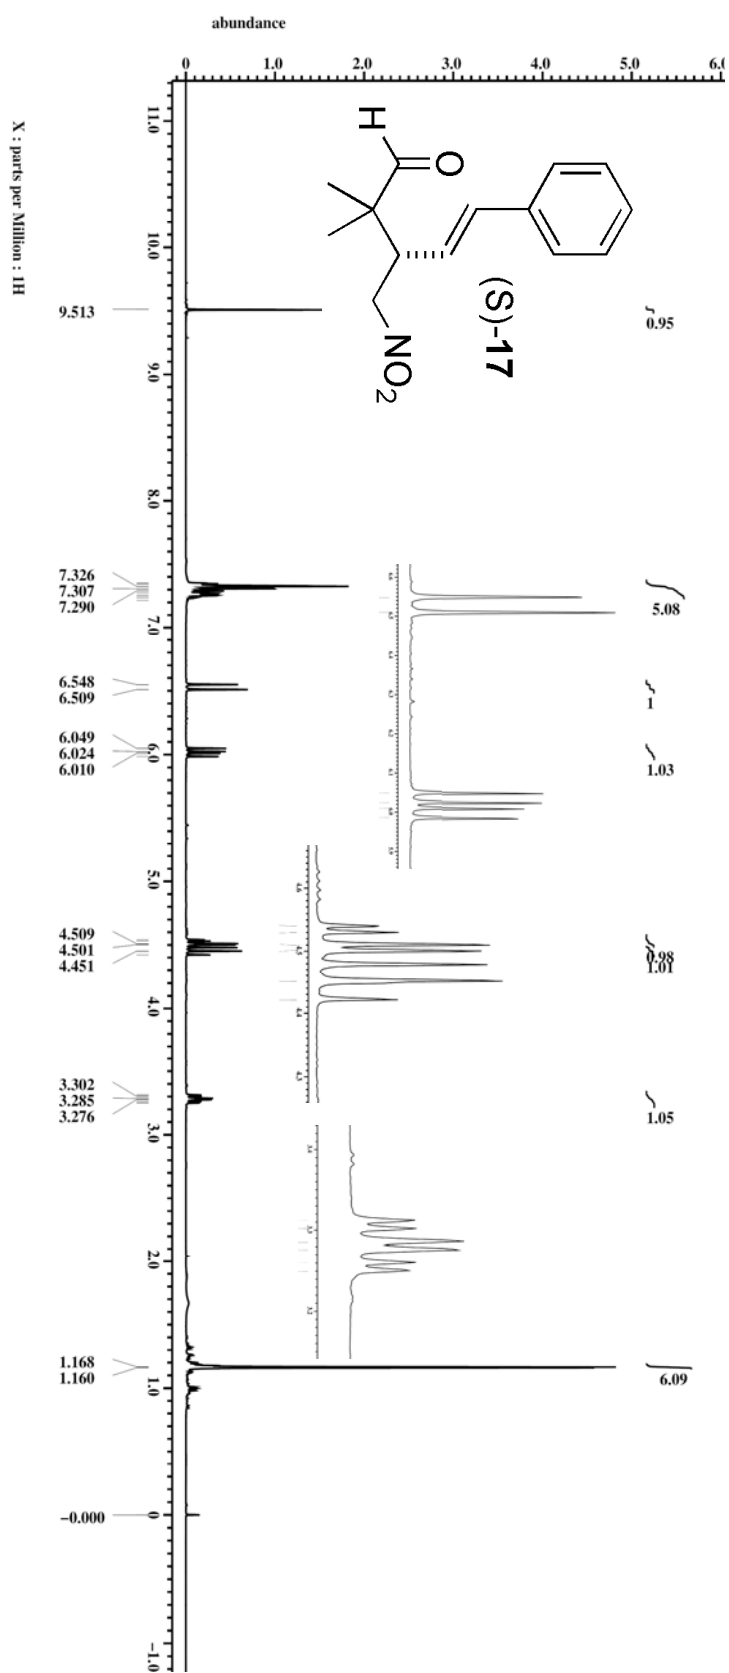

**(S)-1-(2-nitro-1-phenyl-ethyl)-cyclopentanecarbaldehyde (18):**

The title compound was prepared from *trans*- $\beta$ -nitrostyrene and cyclopentanecarbaldehyde using method C. Reaction time: 7 h; purified by flash column chromatography; yield = 89%; ee = 97% as determined by HPLC (CHIRALCEL OD-H, *i*-PrOH/n-heptane 20/80, flow rate = 1.0 mL/min,  $\lambda$  = 220 nm);  $t_{\text{minor}}$  = 10.6 min,  $t_{\text{major}}$  = 14.6 min.  $^1\text{H NMR}$  (400 MHz,  $\text{CDCl}_3$ ) (ppm): 1.51-1.67 (m, 6H), 1.86-1.92 (m, 1H), 2.02-2.07 (m, 1H), 3.69 (dd, 1H,  $J$  = 3.7, 11.5 Hz), 4.7 (dd, 1H,  $J$  = 3.7, 13.3 Hz), 4.96 (dd, 1H,  $J$  = 11.5, 13.3 Hz), 7.18-7.20 (m, 2H), 7.26-7.33 (m, 3H), 9.49 (s, 1H).

**Racemic 1-(2-nitro-1-phenyl-ethyl)-cyclopentanecarbaldehyde**

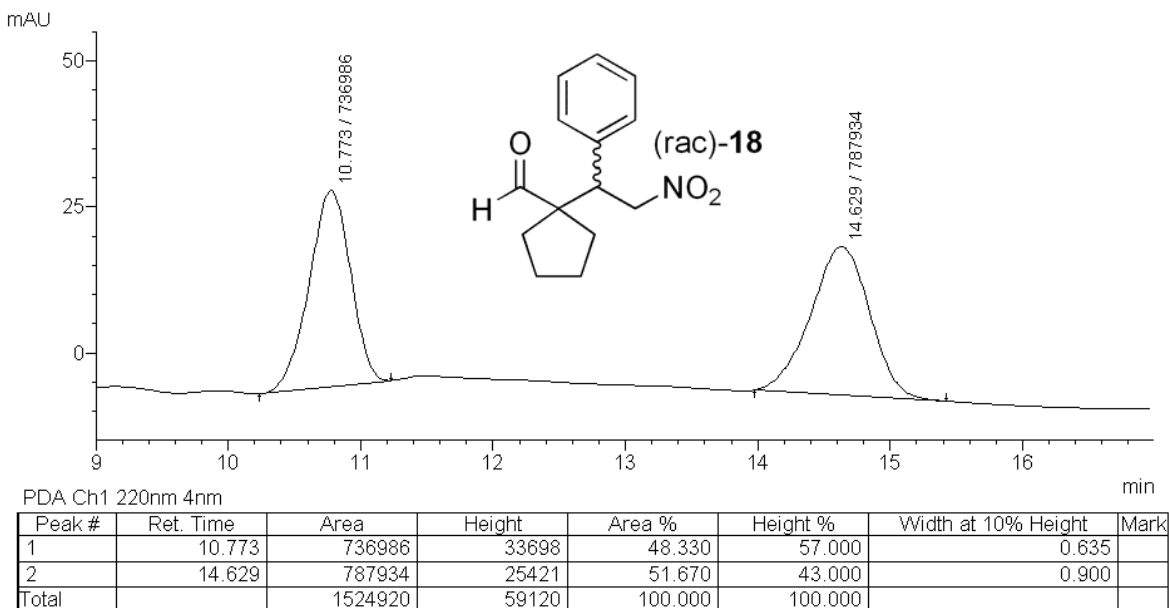

**Enantioenriched 1-(2-nitro-1-phenyl-ethyl)-cyclopentanecarbaldehyde**

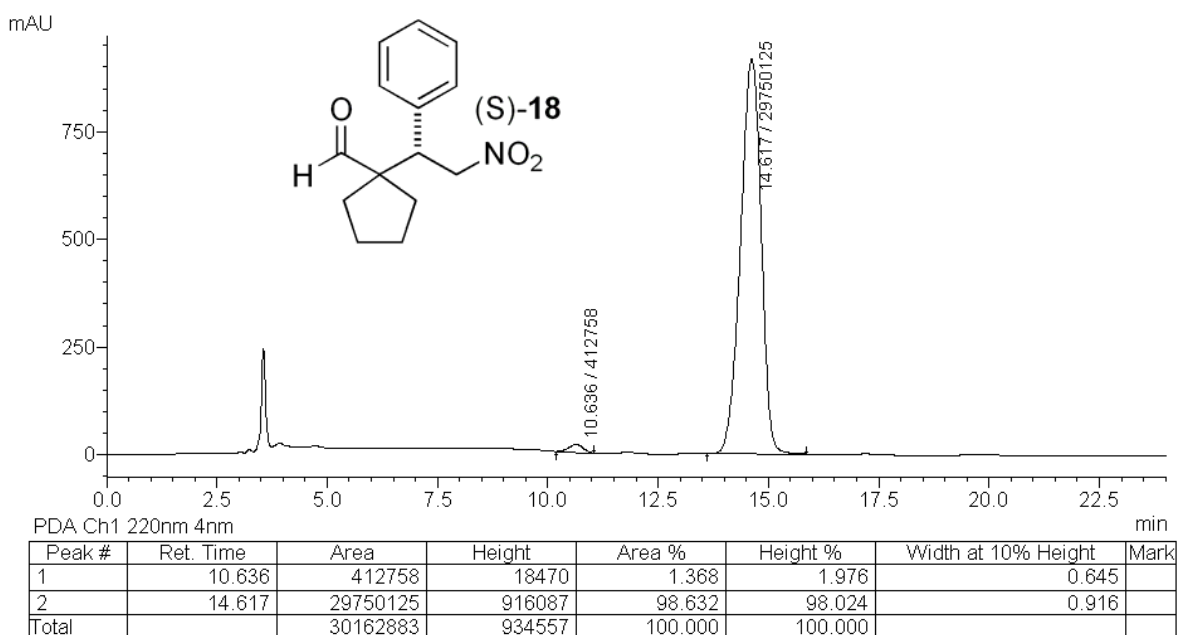



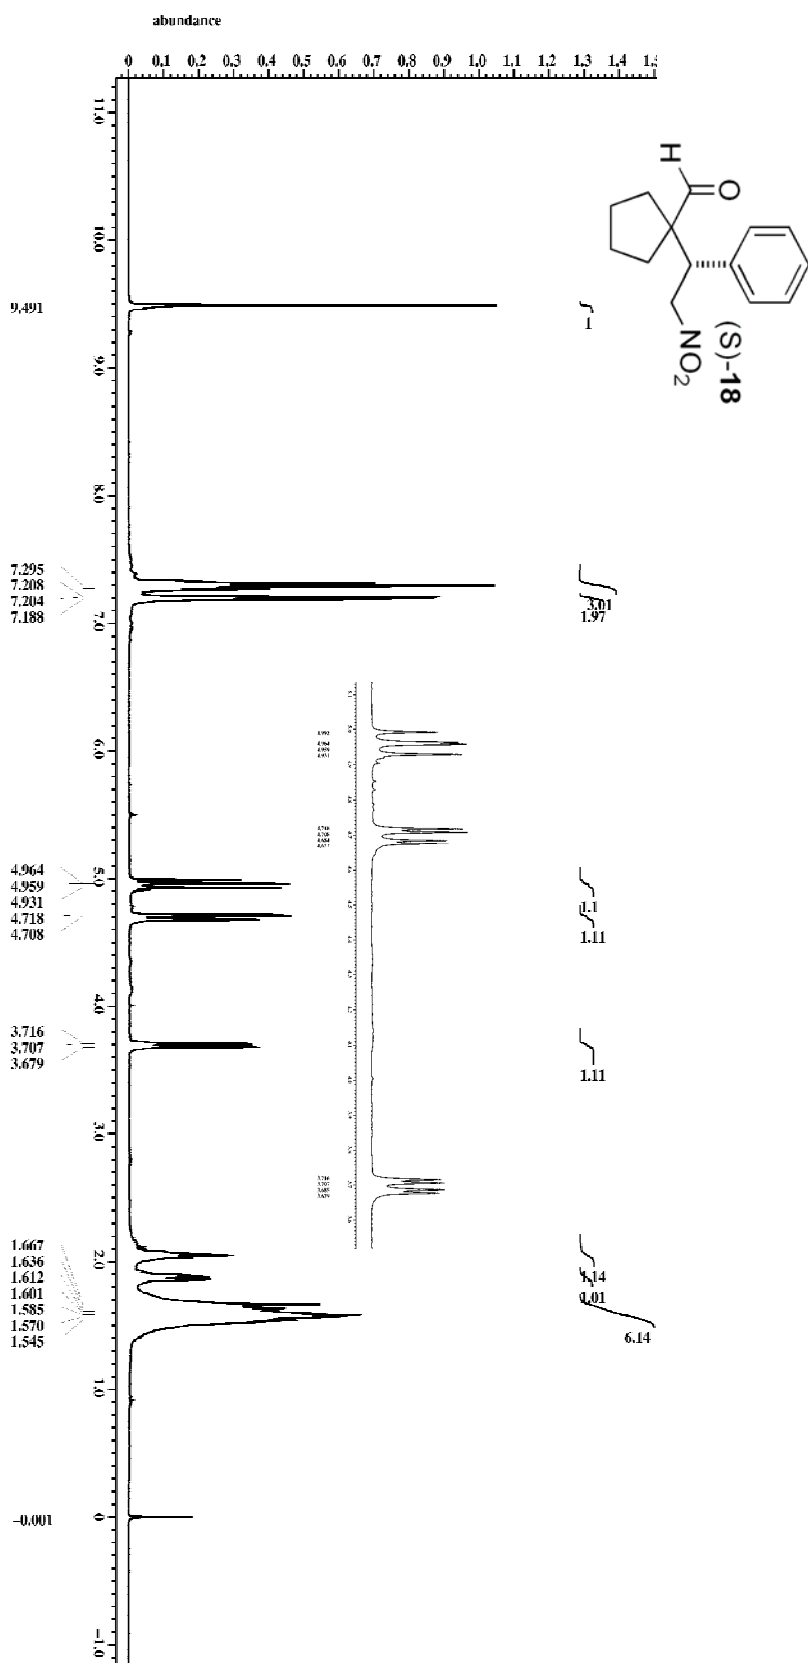

### (S)-1-(2-nitro-1-phenyl-ethyl)-cyclohexanecarbaldehyde (19):

The title compound was prepared from *trans*- $\beta$ -nitrostyrene and cyclohexanecarbaldehyde using method C, and using a catalytic system having 10 mol% each of sulfamide, DMAP and O<sup>t</sup>Bu-L-threonine.

Compound obtained using method C: Reaction time: 30 h; flash column chromatography: (EtOAc/Pet ether = 7:93); yield = 64%; ee = 90% as determined by HPLC (CHIRALCEL OD-H, *i*-PrOH/n-heptane 20/80, flow rate = 1.0 mL/min,  $\lambda$  = 220 nm);  $t_{\text{minor}}$  = 9.4 min,  $t_{\text{major}}$  = 20.8 min.

Compound obtained using 10 mol% sulfamide, DMAP and O<sup>t</sup>Bu-L-threonine: Reaction time: 48 h; flash column chromatography: (EtOAc/Pet ether = 7:93); yield = 88%; ee = 91% as determined by HPLC (conditions and retention times as above). <sup>1</sup>H NMR (400 MHz, CDCl<sub>3</sub>) (ppm): 1.06-1.27 (m, 4H), 1.36-1.43 (m, 1H), 1.56-1.68 (m, 3H), 1.84-1.88 (m, 1H), 2.06-2.09 (m, 1H), 3.54 (dd, 1H,  $J$  = 4.6, 11 Hz), 4.73 (dd, 1H,  $J$  = 4.6, 13.3 Hz), 4.8 (dd, 1H,  $J$  = 11, 13.3 Hz), 7.10-7.14 (m, 2H), 7.26-7.33 (m, 3H), 9.54 (s, 1H)

### Racemic 1-(2-nitro-1-phenyl-ethyl)-cyclohexanecarbaldehyde

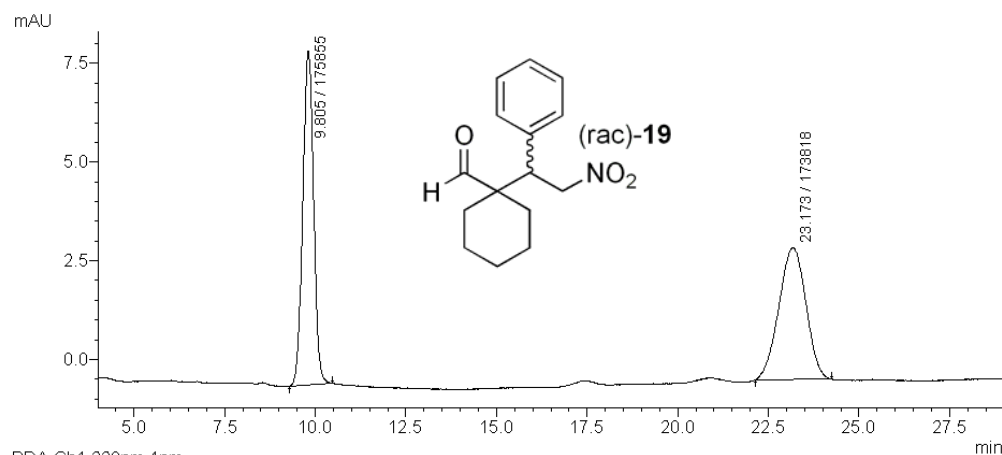

PDA Ch1 220nm 4nm

| Peak # | Ret. Time | Area   | Height | Area %  | Height % | Width at 10% Height | Mark |
|--------|-----------|--------|--------|---------|----------|---------------------|------|
| 1      | 9.805     | 175855 | 8453   | 50.291  | 71.658   | 0.595               |      |
| 2      | 23.173    | 173818 | 3343   | 49.709  | 28.342   | 1.481               |      |
| Total  |           | 349673 | 11797  | 100.000 | 100.000  |                     |      |

### Enantioenriched 1-(2-nitro-1-phenyl-ethyl)-cyclohexanecarbaldehyde

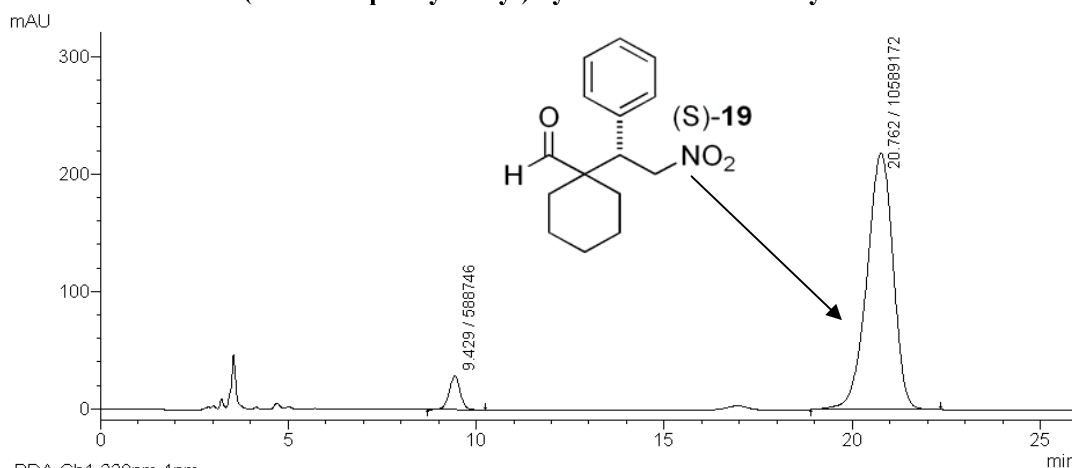

PDA Ch1 220nm 4nm

| Peak # | Ret. Time | Area     | Height | Area %  | Height % | Width at 10% Height | Mark |
|--------|-----------|----------|--------|---------|----------|---------------------|------|
| 1      | 9.429     | 588746   | 28891  | 5.267   | 11.673   | 0.600               |      |
| 2      | 20.762    | 10589172 | 218616 | 94.733  | 88.327   | 1.389               |      |
| Total  |           | 11177918 | 247506 | 100.000 | 100.000  |                     |      |

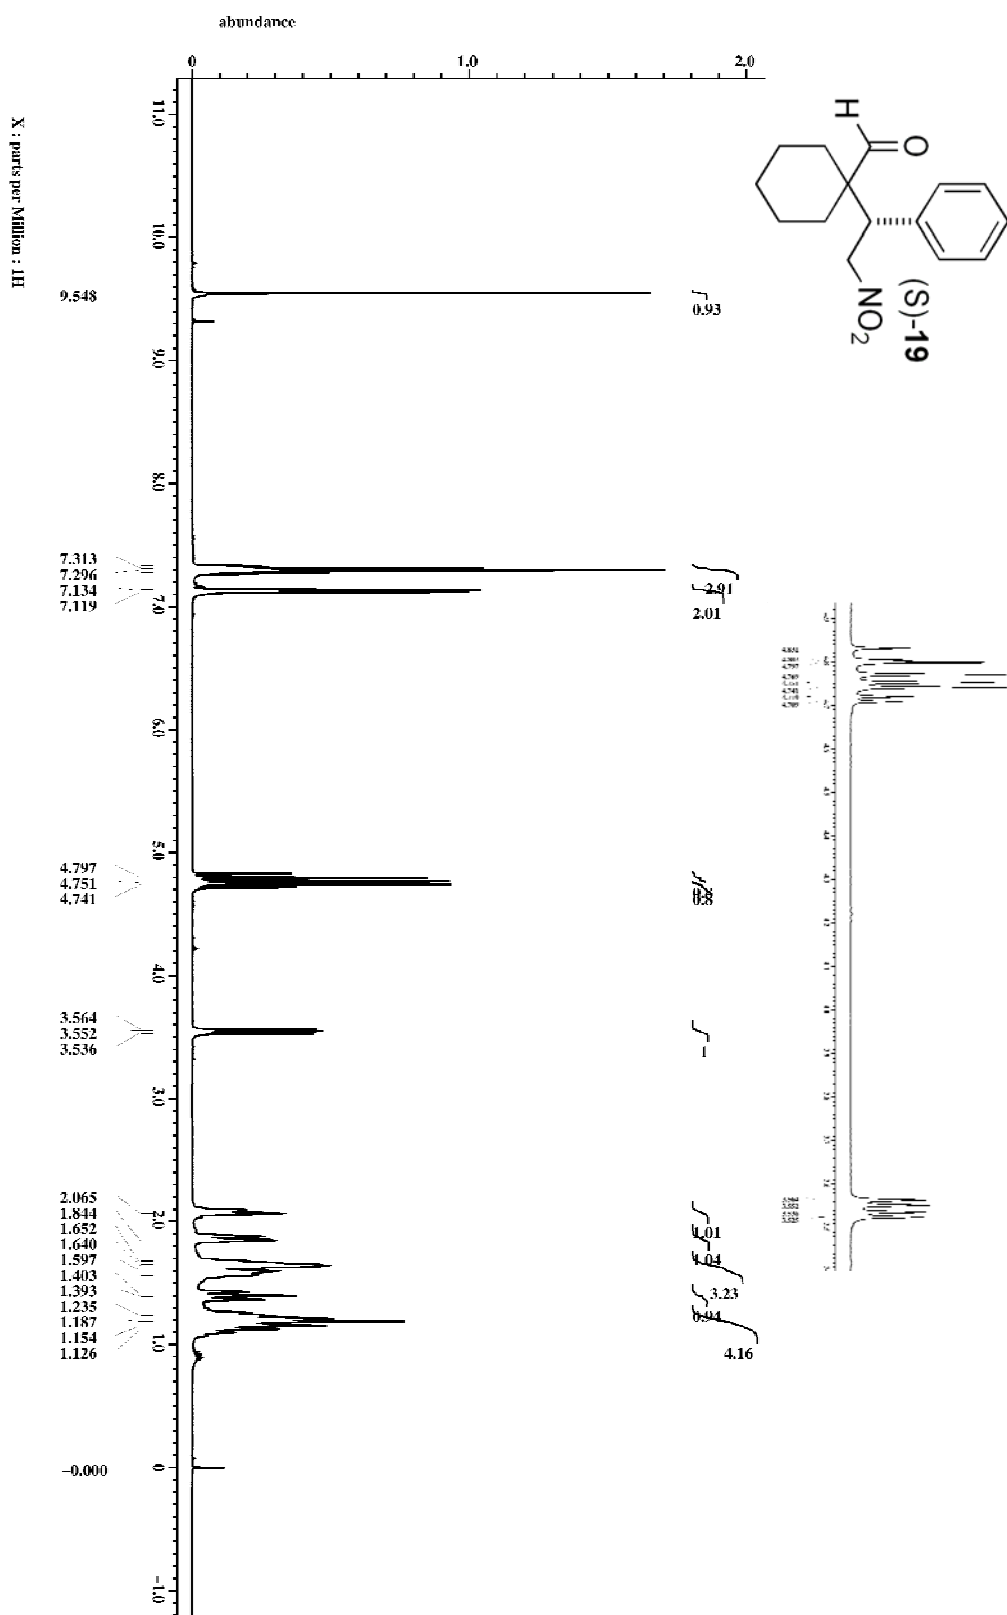

**(2S,3S)-2-ethyl-2-methyl-4-nitro-3-phenyl-butyraldehyde (20):**

The title compound was prepared from *trans*- $\beta$ -nitrostyrene and 2-methylbutanal using method C. Reaction time: 12 h; flash column chromatography: (EtOAc/Pet ether = 7:93); yield = 84%; ee = 97%, dr = 70:30 (*syn*/*anti*) as determined by HPLC (CHIRALCEL OD-H, *i*-PrOH/n-heptane 10/90, flow rate = 1.0 mL/min,  $\lambda$  = 220 nm);  $t_{(anti, minor)}$  = 13.4 min,  $t_{(syn, minor)}$  = 15.9 min,  $t_{(anti, major)}$  = 17.8 min,  $t_{(syn, major)}$  = 24.1 min.  $^1\text{H NMR}$  (400 MHz,  $\text{CDCl}_3$ , diastereomer mixture) (ppm): 0.8 (*syn*) and 0.88 (*anti*) (t, 3H,  $J$  = 7.5 and 7.4 Hz), 1.1 (*syn*) and 1.13 (*anti*) (s, 3H), 1.24-1.34 (m, 1H), 1.5-1.77 (m, 1H), 3.77 (*anti*) and 3.79 (*syn*) (dd, 1H,  $J$  = 4.4, 11.2 and 4.0, 11.5 Hz), 4.61 (*syn*) and 4.76 (*anti*) (dd, 1H,  $J$  = 4.0, 13.0 and 4.4, 13.1 Hz), 4.83 (*syn*) and 4.85 (*anti*) (dd, 1H,  $J$  = 11.5, 13.0 and 11.2, 13.1 Hz), 7.15-7.21 (m, 2H), 7.27-7.34 (m, 3H), 9.51 (*anti*) and 9.53 (*syn*)

**Racemic 2-ethyl-2-methyl-4-nitro-3-phenyl-butyraldehyde (s, 1H).**

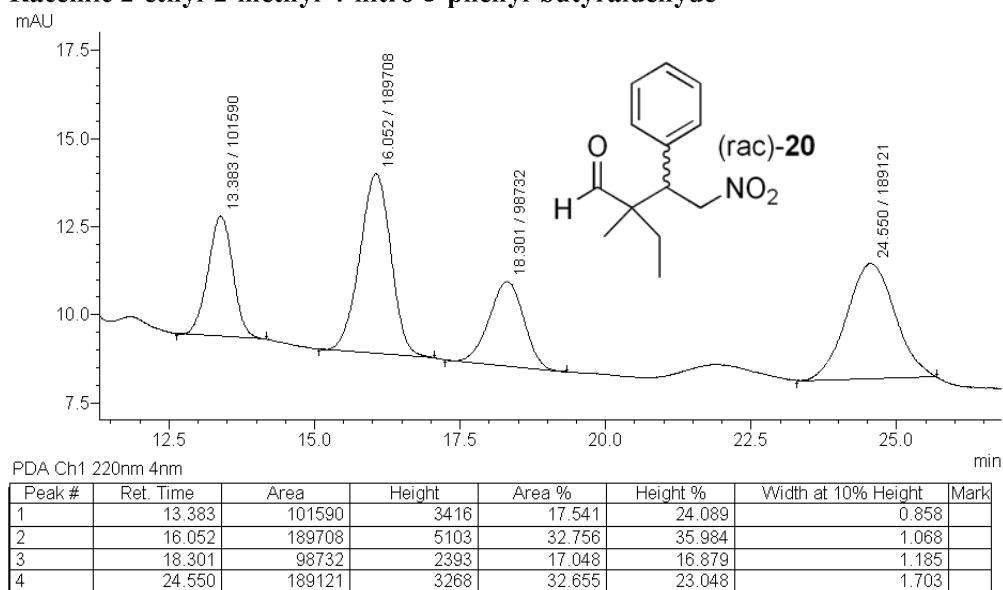

**Enantioenriched 2-ethyl-2-methyl-4-nitro-3-phenyl-butyraldehyde**

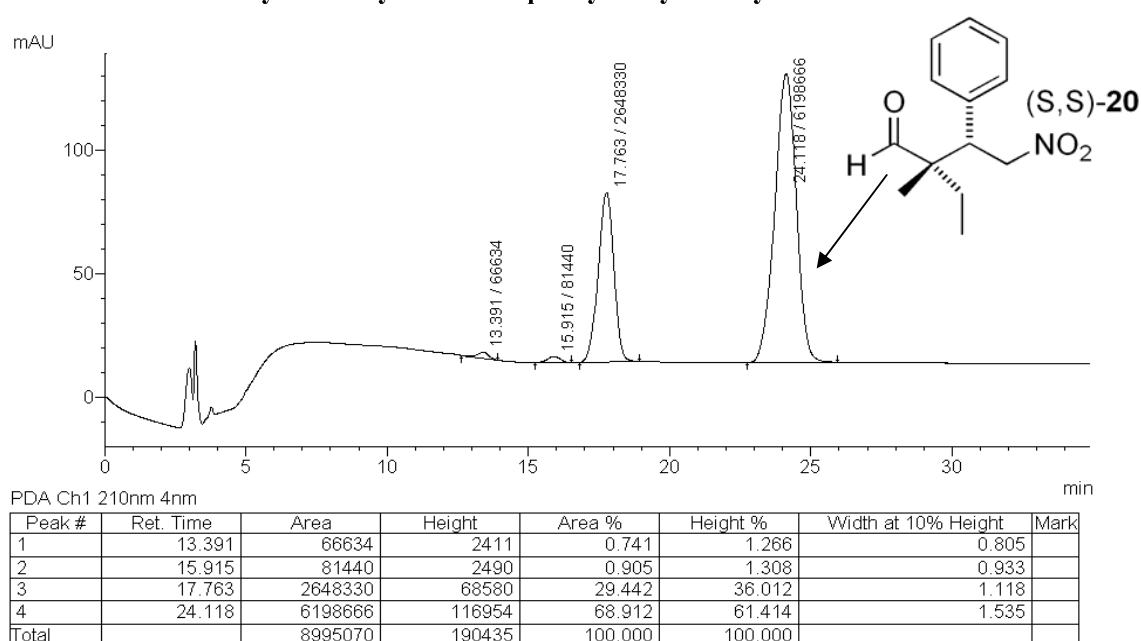

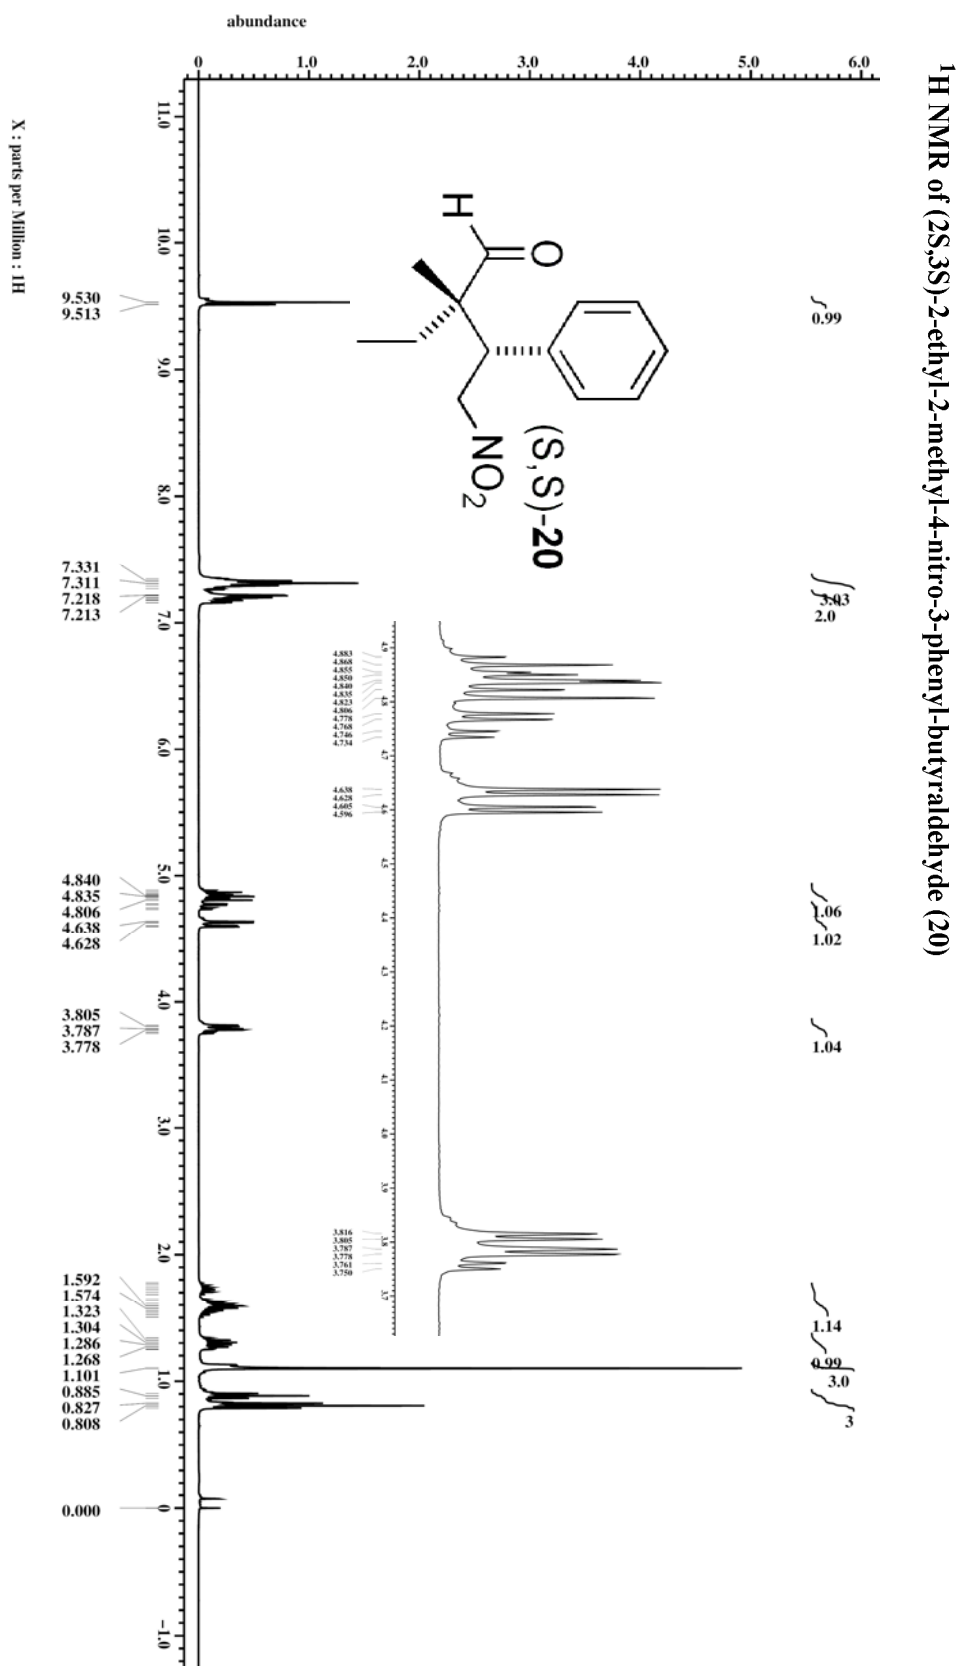

**(2S)-2-methyl-2-[(2S)-2-nitro-1-phenylethyl]undecanal (21):**

The title compound was prepared from *trans*- $\beta$ -nitrostyrene and 2-methylundecanal using method C. Reaction time: 12 h flash column chromatography: (EtOAc/Pet ether = 7:93); yield = 71%; ee = 91%, dr = 78:22 (syn/anti) as determined by HPLC (CHIRALCEL OD-H, *i*-PrOH/n-heptane 5/95, flow rate = 0.7 mL/min,  $\lambda$  = 220 nm);  $t_{(anti, minor)}$  = 14.9 min,  $t_{(anti, major)}$  = 16.1 min,  $t_{(syn, minor)}$  = 17.5 min,  $t_{(syn, major)}$  = 23.7 min.  $^1\text{H NMR}$  (400 MHz,  $\text{CDCl}_3$ ) (ppm): 0.87-0.88 (m, 3H), 1.1 (s, 3H), 1.14-1.72 (m, 16H), 3.79 (dd, 1H,  $J$  = 4.1, 11.5 Hz), 4.62 (dd, 1H,  $J$  = 4.1, 12.8 Hz), 4.84 (dd, 1H,  $J$  = 11.5, 12.8 Hz), 7.15-7.21 (m, 2H), 7.26-7.35 (m, 3H), 9.52 (s, 1H).

**Racemic 2-methyl-2-(2-nitro-1-phenylethyl)undecanal**

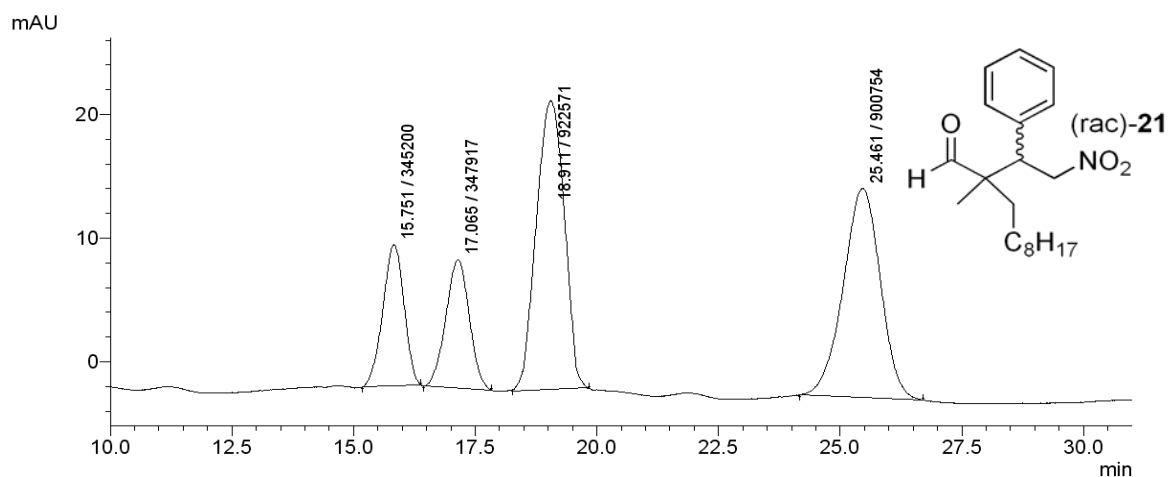

PDA Ch1 207nm 4nm

| Peak # | Ret. Time | Area    | Height | Area %  | Height % | Width at 10% Height | Mark |
|--------|-----------|---------|--------|---------|----------|---------------------|------|
| 1      | 15.751    | 345200  | 11402  | 13.718  | 18.369   | 0.874               |      |
| 2      | 17.065    | 347917  | 10373  | 13.826  | 16.711   | 0.972               |      |
| 3      | 18.911    | 922571  | 23366  | 36.662  | 37.645   | 1.053               |      |
| 4      | 25.461    | 900754  | 16929  | 35.795  | 27.274   | 1.554               |      |
| Total  |           | 2516441 | 62070  | 100.000 | 100.000  |                     |      |

**Enantioenriched 2-methyl-2-(2-nitro-1-phenylethyl)undecanal**

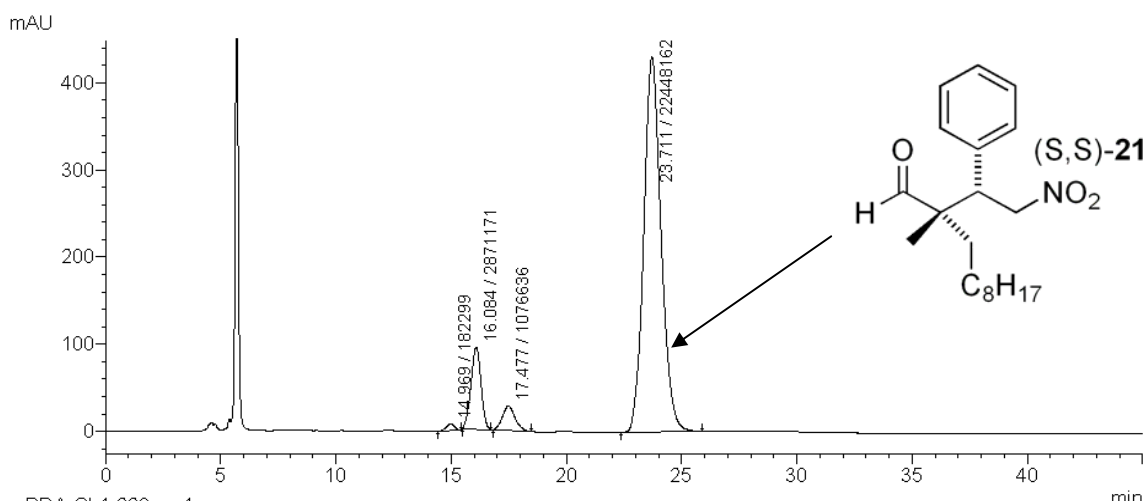

PDA Ch1 220nm 4nm

| Peak # | Ret. Time | Area     | Height | Area %  | Height % | Width at 10% Height | Mark |
|--------|-----------|----------|--------|---------|----------|---------------------|------|
| 1      | 14.969    | 182299   | 7444   | 0.686   | 1.328    | 0.696               |      |
| 2      | 16.084    | 2871171  | 94528  | 10.803  | 16.860   | 0.888               |      |
| 3      | 17.477    | 1076636  | 28153  | 4.051   | 5.021    | 1.157               |      |
| 4      | 23.711    | 22448162 | 430549 | 84.461  | 76.791   | 1.569               |      |
| Total  |           | 26578269 | 560674 | 100.000 | 100.000  |                     |      |

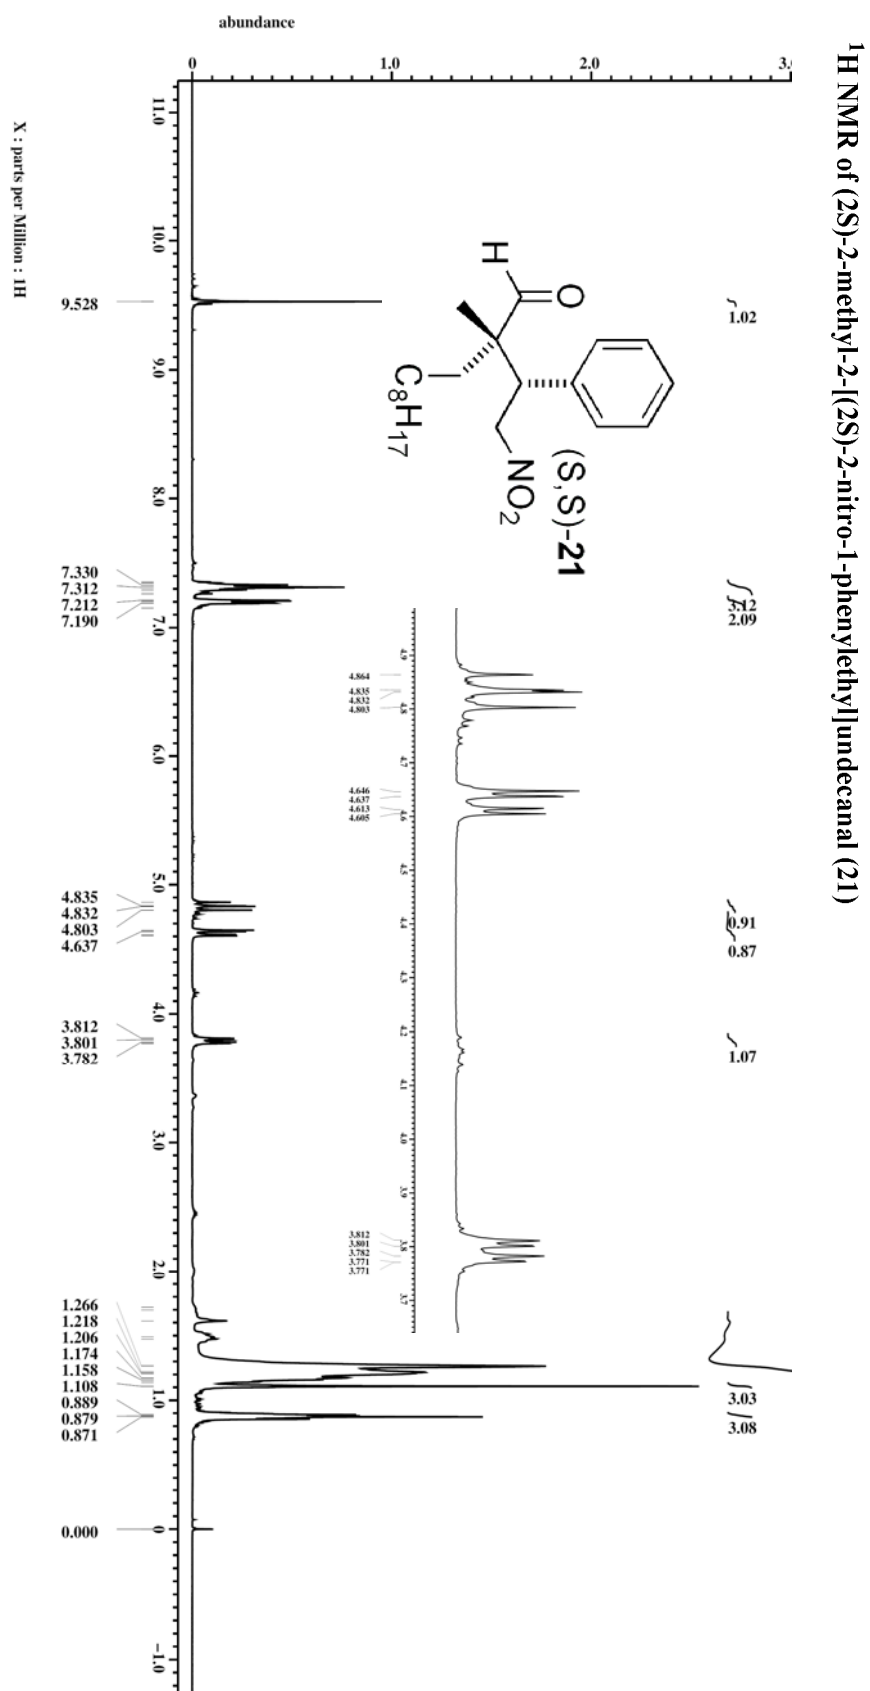

**(2S)-2,6-dimethyl-2-[(1S)-2-nitro-1-phenylethyl]hept-5-enal (22):**

The title compound was prepared from *trans*- $\beta$ -nitrostyrene and 2,6-dimethylhept-5-enal using method C. Reaction time: 12 h; flash column chromatography: (EtOAc/Pet ether = 7:93); yield = 70%; ee = 98%, dr = 77:23 (*syn/anti*) as determined by HPLC (CHIRALCEL OD-H, *i*-PrOH/n-heptane 1/99, flow rate = 1.5 mL/min,  $\lambda$  = 220 nm);  $t_{(anti, minor)}$  = 28.9 min,  $t_{(syn, minor)}$  = 35.6 min,  $t_{(syn, major)}$  = 38.8 min,  $t_{(anti, major)}$  = 48.3 min.  $^1\text{H NMR}$  (400 MHz,  $\text{CDCl}_3$ , diastereomer mixture) (ppm): 1.12 (*anti*) and 1.13 (*syn*) (s, 3H), 1.23-1.31 (m, 1H), 1.54-1.72 (m, 1H), 1.52 (*syn*) and 1.55 (*anti*) (s, 3H), 1.63 (*syn*) and 1.65 (*anti*) (s, 3H), 1.83-1.88 (m, 2H), 3.76 (*anti*) and 3.78 (*syn*) (dd, 1H,  $J$  = 4.5, 11 and 4.1, 11.5 Hz), 4.63 (*syn*) and 4.76 (*anti*) (dd, 1H,  $J$  = 4.1, 12.8 and 4.5, 13.1 Hz), 4.82 (*syn*) and 4.84 (*anti*) (dd, 1H,  $J$  = 11.5, 12.8 and 11, 13.1 Hz), 4.92 (*syn*) and 4.99 (*anti*) (t, 1H,  $J$  = 7.3 Hz), 7.15-7.21 (m, 2H), 7.27-7.35 (m, 3H), 9.53 (*anti*) and 9.54 (*syn*) (s, 1H).

**Racemic 2,6-dimethyl-2-(2-nitro-1-phenylethyl)hept-5-enal**

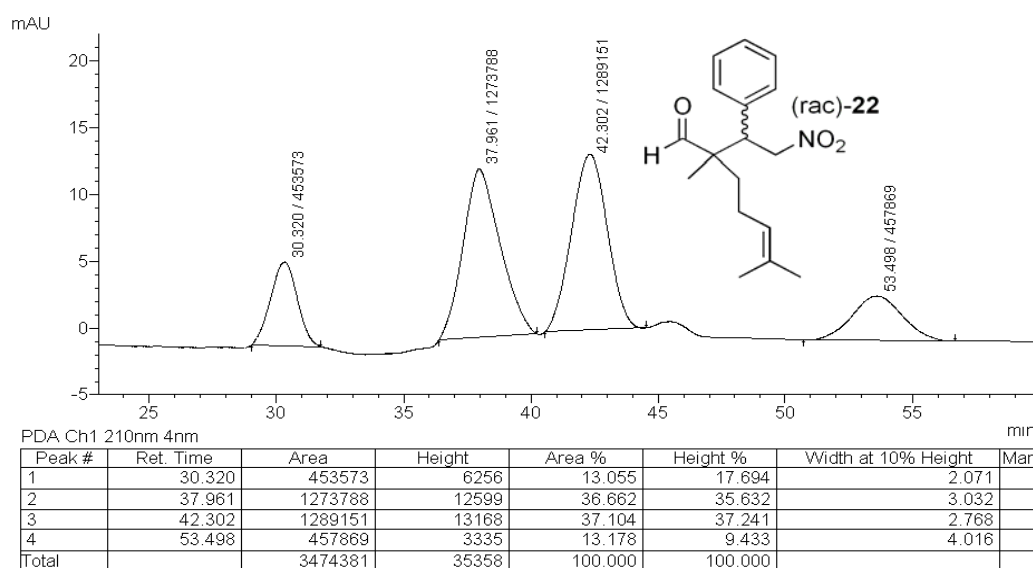

**Enantioenriched 2,6-dimethyl-2-(2-nitro-1-phenylethyl)hept-5-enal**

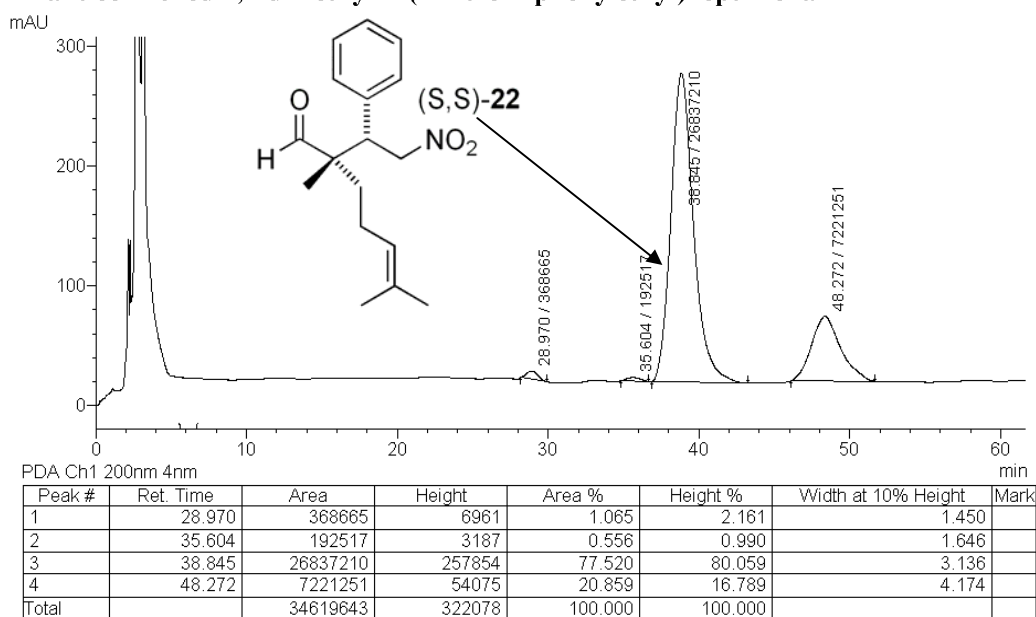



<sup>1</sup>H NMR of (2S)-2,6-dimethyl-2-[(1S)-2-nitro-1-phenylethyl]hept-5-enal (22)

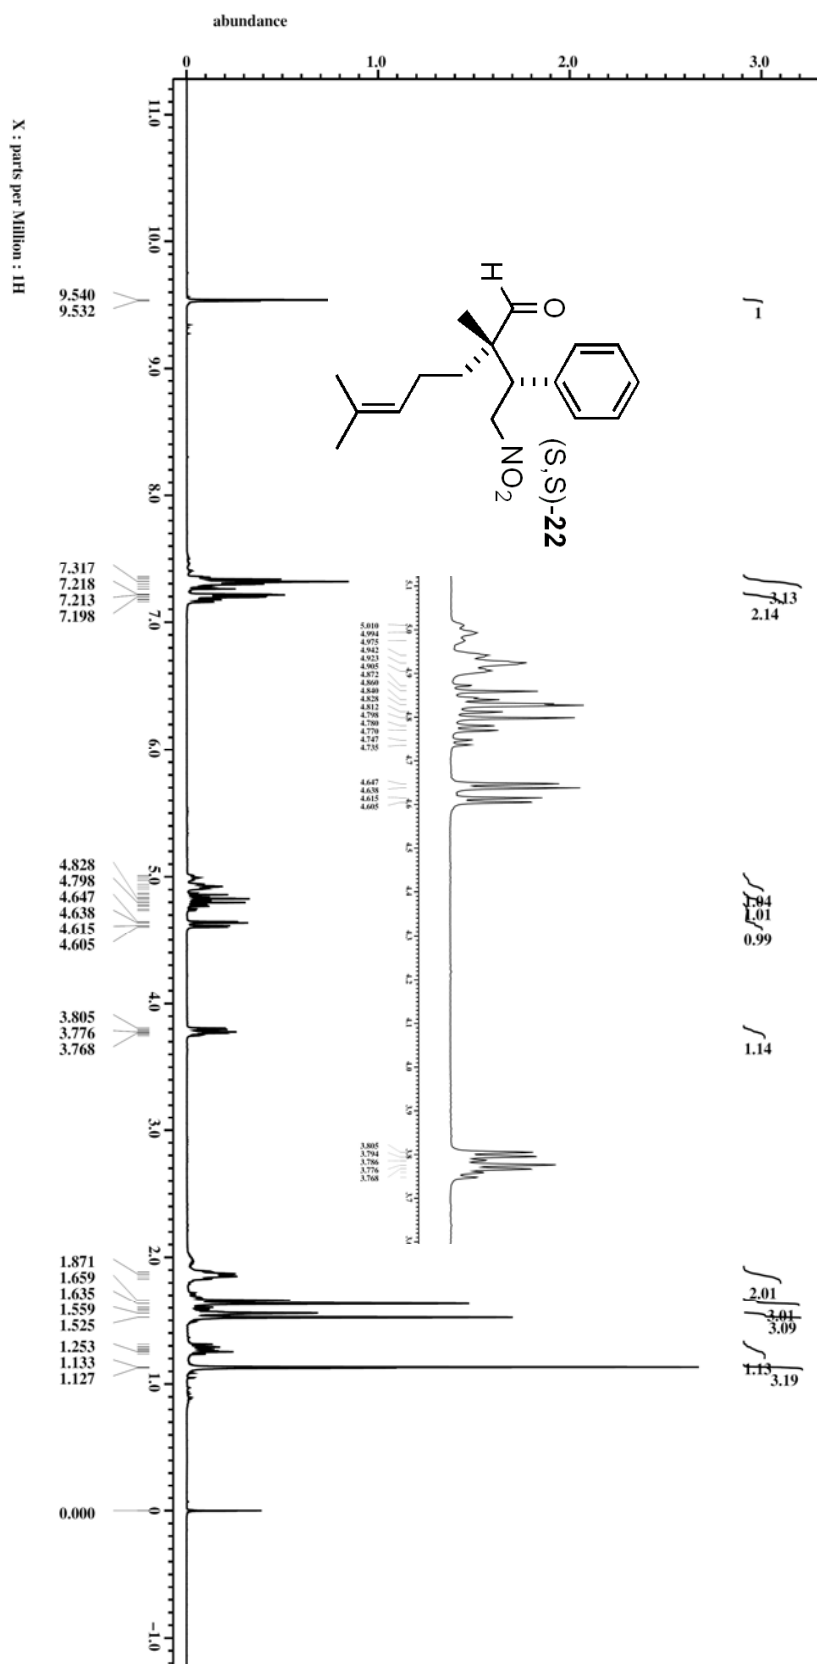

### (2S)-2,6-dimethyl-2-[(1S)-2-nitro-1-(4-fluorophenyl)ethyl]hept-5-enal (**23**):

The title compound was prepared from *trans*-4-fluoro- $\beta$ -nitrostyrene and 2,6-dimethylhept-5-enal using method C. Reaction time: 36 h;  $R_f = 0.58$  (*syn*) EtOAc/pet ether (2:8); flash column chromatography: (EtOAc/Pet ether = 7:93); yield = 80%; ee 99%, dr = 77:23 (*syn/anti*) as determined by HPLC (CHIRALCEL OD-H, *i*-PrOH/heptane 1/99, flow rate = 1.5 mL/min,  $\lambda = 220$  nm);  $t_{(anti, minor)} = 36.6$  min,  $t_{(syn, minor)} = 38.9$  min,  $t_{(syn, major)} = 50.8$  min,  $t_{(anti, major)} = 63.7$  min. The compound was tentatively assigned the *S,S* (*syn*) configuration according to the  $^1\text{H}$  NMR chemical shift trend for the *syn* and *anti* products of compound **22**.  $^1\text{H}$  NMR (400 MHz,  $\text{CDCl}_3$ , diastereomer mixture) (ppm): 1.12 (s, 3H), 1.21-1.30 (m, 1H), 1.48-1.64 (m, 1H), 1.53 (*syn*) and 1.55 (*anti*) (s, 3H), 1.63 (*syn*) and 1.66 (*anti*) (s, 3H), 1.80-1.20 (m, 2H), 3.78 (*syn*) (dd, 1H,  $J = 3.7, 11.4$  Hz), 4.62 (*syn*) (dd, 1H,  $J = 4.0, 13.2$  Hz), 4.75-4.82 (*syn*) (m, 1H), 4.90-5.00 (m, 1H), 7.01-7.05 (m, 2H), 7.15-7.26 (m, 2H), 9.50 (*anti*) and 9.52 (*syn*) (s, 1H).  $^{13}\text{C}$  NMR (100MHz,  $\text{CDCl}_3$ ) (ppm): 15.9, 17.7, 22.6, 25.6, 35.5, 47.0, 51.6, 76.4, 116, 122.8, 130.9, 133.1, 161.1, 163.7, 204.9. FT-IR: (KBr),  $\nu_{\text{max}}$ : 1630, 1556, 1511, 1377, 1105, 741, 470  $\text{cm}^{-1}$ ; MS: HRMS (ESI-TOF) calculated for  $\text{C}_{17}\text{H}_{22}\text{FNO}_3$   $[\text{M}+\text{Na}]^+$ : 330.1461; found: 330.1476.

### Racemic 2,6-dimethyl-2-[2-nitro-1-(4-fluorophenyl)ethyl]hept-5-enal

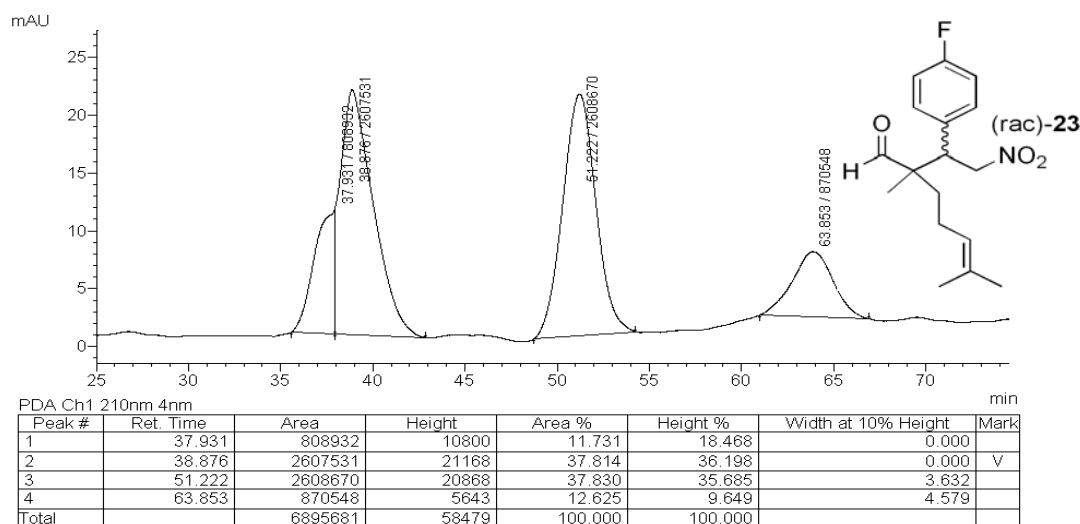

### Enantioenriched 2,6-dimethyl-2-[2-nitro-1-(4-fluorophenyl)ethyl]hept-5-enal

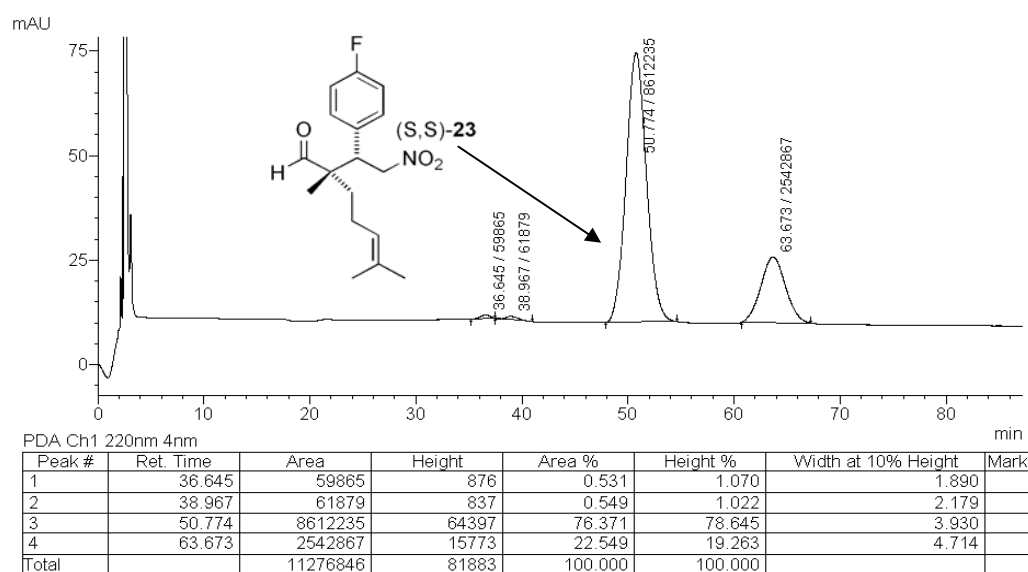

<sup>1</sup>H NMR of (2S)-2,6-dimethyl-2-[(1S)-2-nitro-1-(4-fluorophenyl)ethyl]hept-5-enal (23)

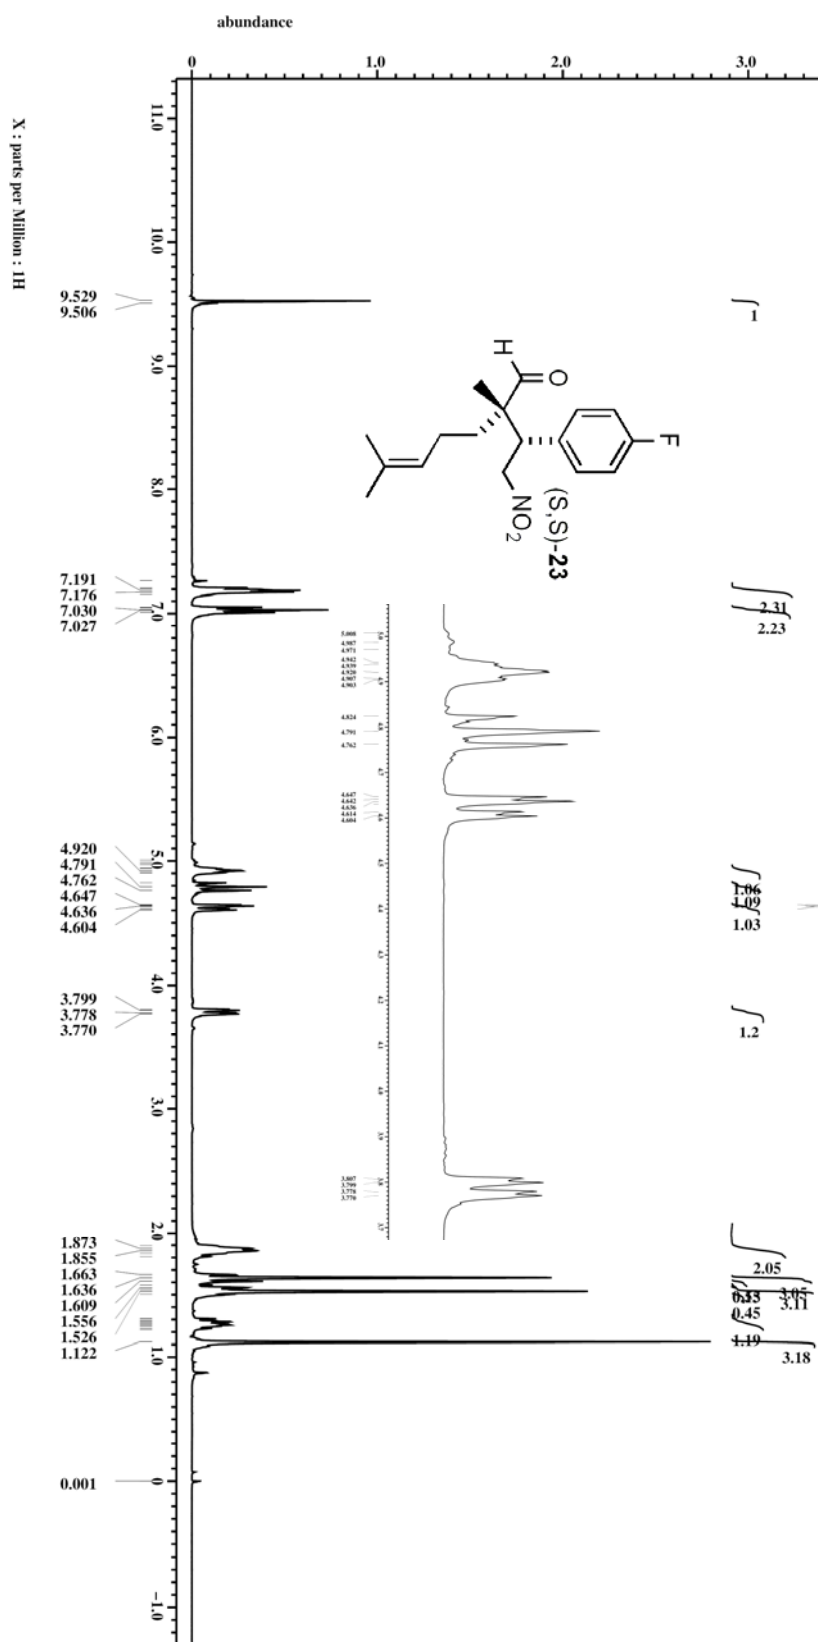

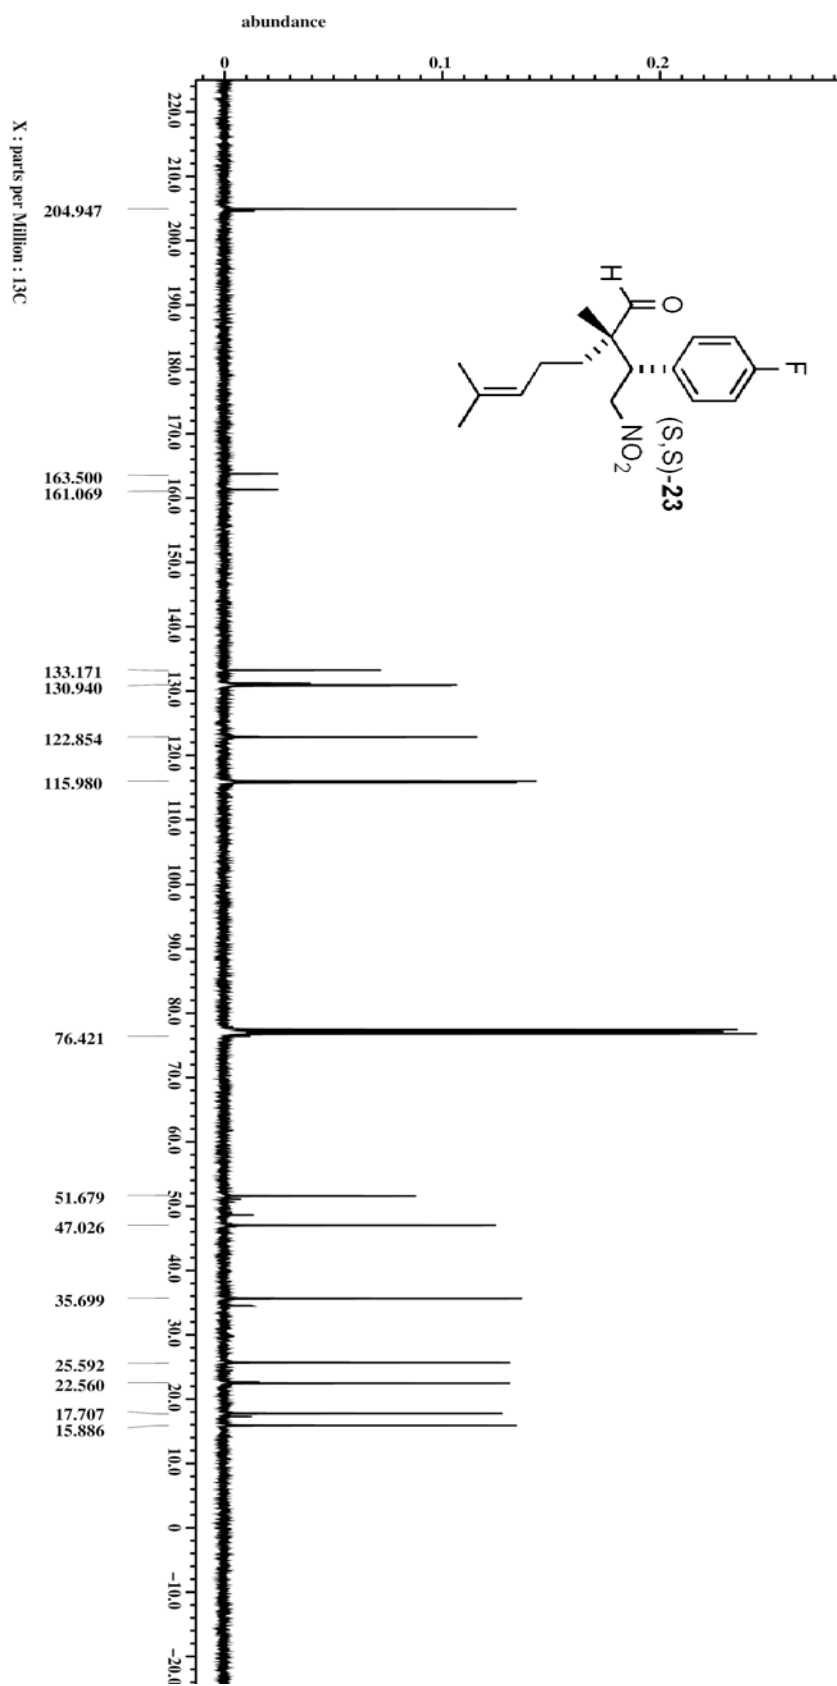

$^{13}\text{C}$  NMR of (2S)-2,6-dimethyl-2-[(1S)-2-nitro-1-(4-fluorophenyl)ethyl]hept-5-enal (**23**)

**(2S)-2,6-dimethyl-2-[(1S)-2-nitro-1-(furan-2-yl)ethyl]hept-5-enal (24):**

The title compound was prepared from *trans*-2-(2-nitrovinyl)furan and 2,6-dimethylhept-5-enal using method C. Reaction time: 16 h;  $R_f = 0.63$  (*syn*) EtOAc/pet ether (2:8); flash column chromatography: (EtOAc/Pet ether = 7:93); yield = 83% (*syn* and *anti*); ee = 97%, dr = 76:24 (*syn/anti*) as determined by HPLC (CHIRALCEL OD-H, *i*-PrOH/n-heptane 1/99, flow rate = 1.5 mL/min,  $\lambda = 220$  nm);  $t_{(\text{syn}, \text{minor})} = 15.6$  min,  $t_{(\text{anti}, \text{minor})} = 18.3$  min,  $t_{(\text{syn}, \text{major})} = 25.6$  min,  $t_{(\text{anti}, \text{major})} = 39.3$  min. The compound was tentatively assigned the S, S (*syn*) configuration according to the general trend of our Michael addition products.  $^1\text{H}$  NMR (400 MHz,  $\text{CDCl}_3$ , *syn* product) (ppm): 1.18 (s, 3H), 1.34-1.53 (m, 2H), 1.54 (s, 3H), 1.64 (s, 3H), 1.78-1.88 (m, 1H), 1.89-1.99 (m, 1H), 3.96 (dd, 1H,  $J = 3.9, 11.0$  Hz), 4.56 (dd, 1H,  $J = 3.9, 12.8$  Hz), 4.72 (dd, 1H,  $J = 11.0, 12.8$  Hz), 4.92-5.01 (m, 1H), 6.23-6.24 (d, 1H,  $J = 3.2$  Hz), 6.31-6.32 (m, 1H), 7.38 (s, 1H), 9.50 (s, 1H).  $^{13}\text{C}$  NMR (100MHz,  $\text{CDCl}_3$ ) (ppm): 16.5, 17.5, 22.6, 25.8, 35.5, 40.5, 51.7, 75.3, 109.9, 110.5, 122.8, 132.9, 142.8, 149.5, 204.1. FT-IR: (KBr),  $\nu_{\text{max}}$ : 1723, 1630, 1558, 1506, 1435, 1376, 1275, 1261, 1148, 1016, 915, 749  $\text{cm}^{-1}$ ; MS: HRMS (ESI-TOF) calculated for  $\text{C}_{15}\text{H}_{21}\text{NO}_4$   $[\text{M}+\text{Na}]^+$ : 302.1355; found: 330.1363.

**Racemic 2,6-dimethyl-2-[2-nitro-1-(furan-2-yl)ethyl]hept-5-enal**

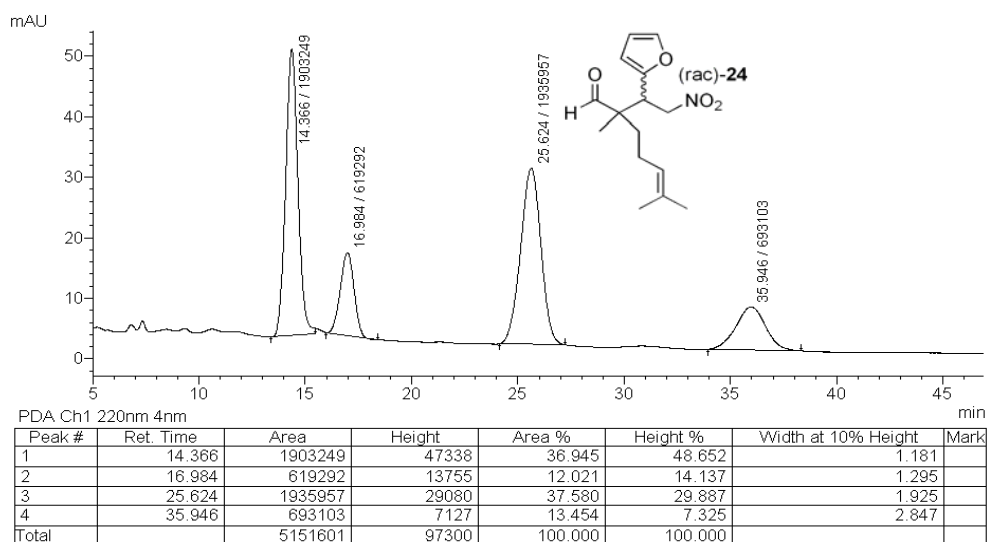

**Enantioenriched 2,6-dimethyl-2-[2-nitro-1-(furan-2-yl)ethyl]hept-5-enal**

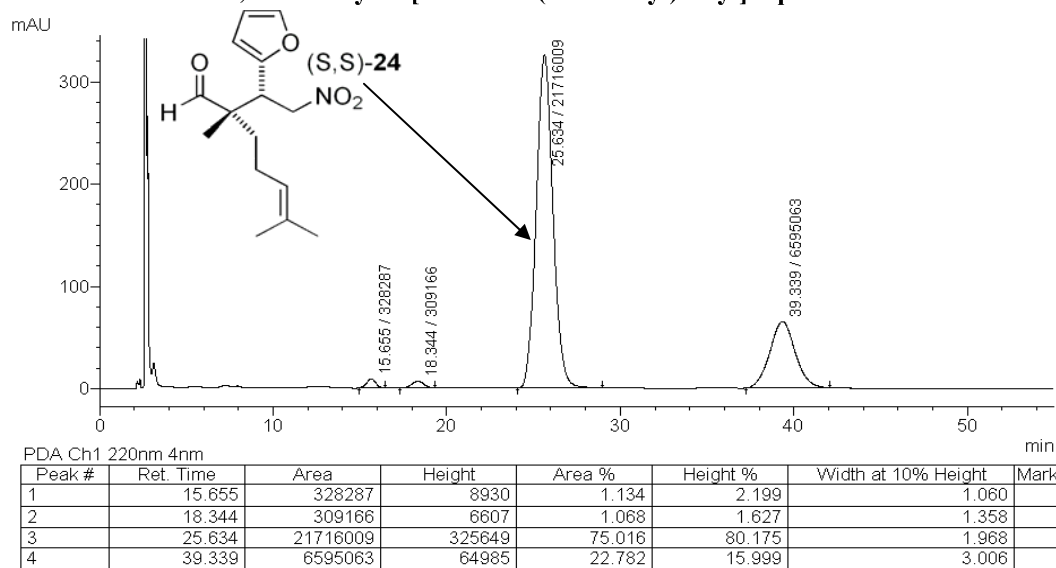

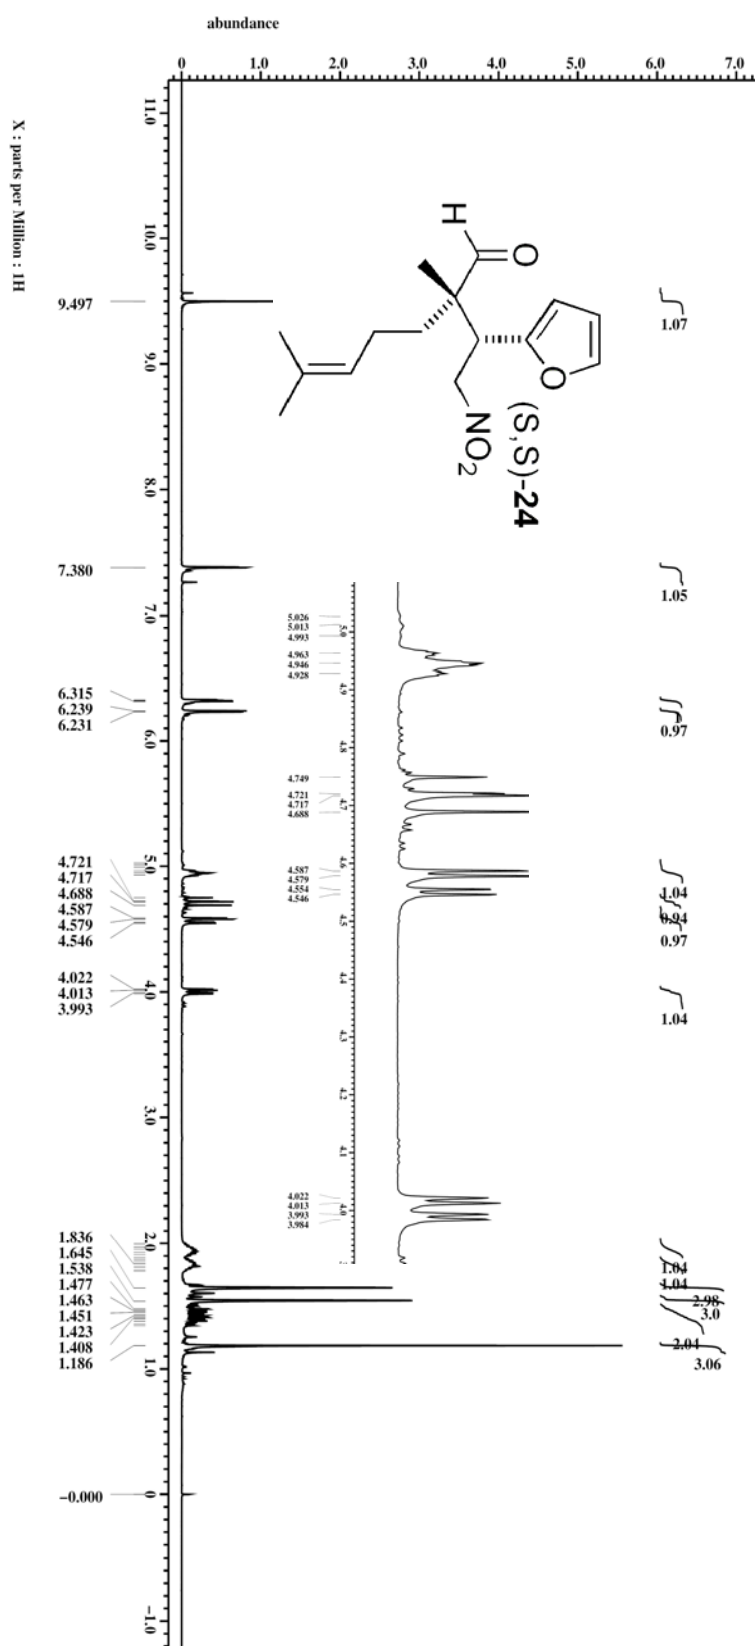

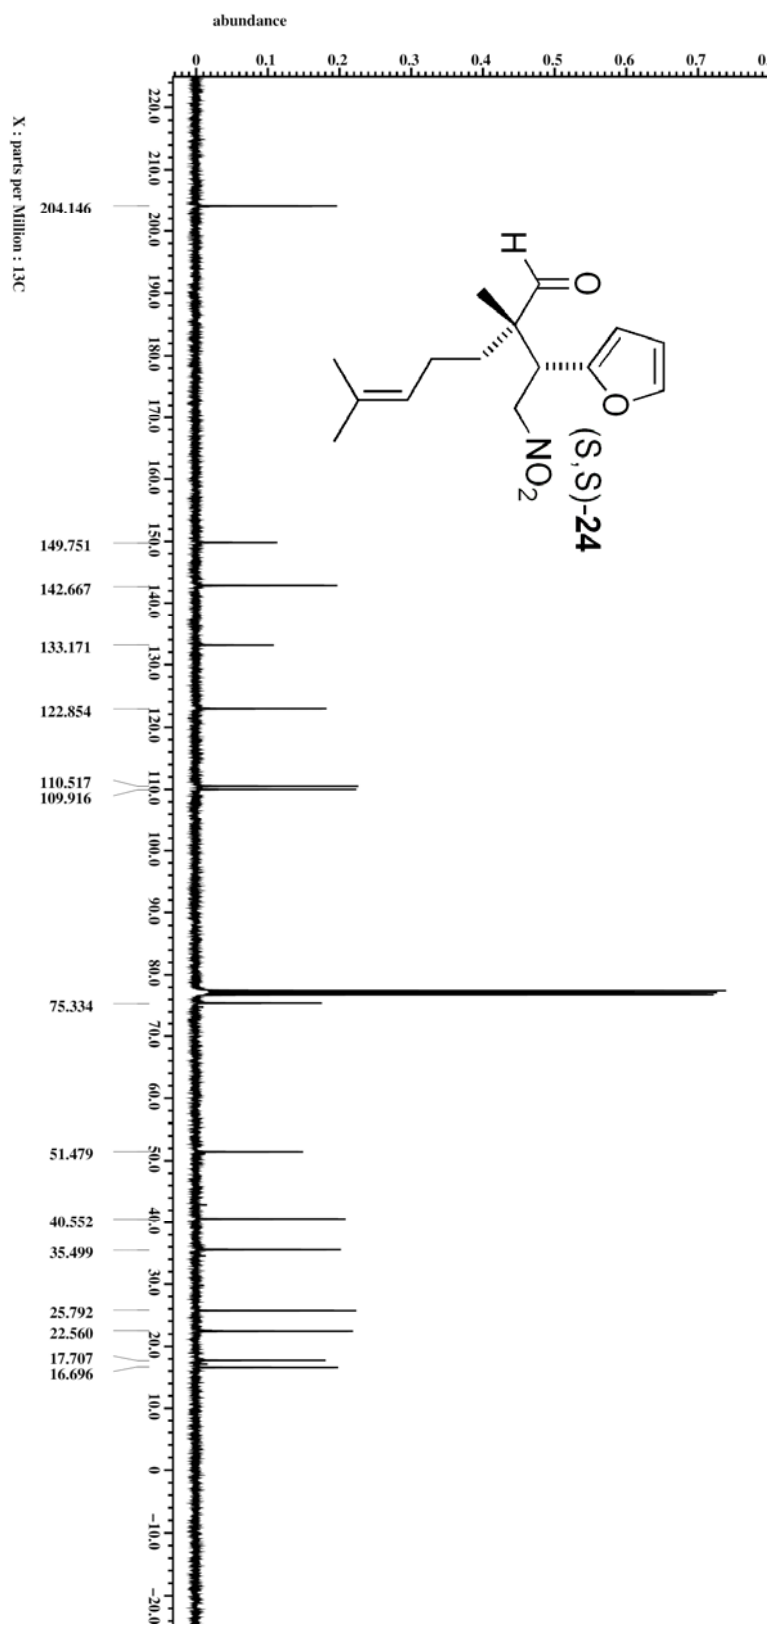

$^{13}\text{C}$  NMR of (2S)-2,6-dimethyl-2-[(1S)-2-nitro-1-(furan-2-yl)ethyl]hept-5-enal (24)
